# Supplementary material for: Genetic Diversity and Selection in Three Plasmodium vivax Merozoite Surface Protein 7 (Pvmsp-7) Genes in a Colombian Population
Source: PubMed Central journal article supplement (PMC3458108; doi:10.1371/journal.pone.0045962), 2012-09-25
Supplement: pone.0045962.s002.pdf [file pone.0045962.s002.pdf]

|       | 340            | *               | 360  | *       | 380 | *          |      |
|-------|----------------|-----------------|------|---------|-----|------------|------|
| Sal-I | : AACLVNVFKKVL | DDEHLQKEFDNFVHG | FYGF | AKRHNYL | RG  | MANENLYKDI | FKNV |
| AND6  | : AACLVNVFKKVL | DDEHLQKEFDNFVHG | FYGF | AKRHNYL | RG  | MANENLYKDI | FKNV |
| ORI2  | : AACLVNVFKKVL | DDEHLQKEFDNFVHG | FYGF | AKRHNYL | RG  | MANENLYKDI | FKNV |
| CAR8  | : AACLVNVFKKVL | DDEHLQKEFDNFVHG | FYGF | AKRHNYL | RG  | MANENLYKDI | FKNV |
| AND7  | : AACLVNVFKKVL | DDEHLQKEFDNFVHG | FYGF | AKRHNYL | RG  | MANENLYKDI | FKNV |
| CAR10 | : AACLVNVFKKVL | DDEHLQKEFDNFVHG | FYGF | AKRHNYL | RG  | MANENLYKDI | FKNV |
| CAR11 | : AACLVNVFKKVL | DDEHLQKEFDNFVHG | FYGF | AKRHNYL | RG  | MANENLYKDI | FKNV |
| AND4  | : AACLVNVFKKVL | DDEHLQKEFDNFVHG | FYGF | AKRHNYL | RG  | MANENLYKDI | FKNV |
| AND5  | : AACLVNVFKKVL | DDEHLQKEFDNFVHG | FYGF | AKRHNYL | RG  | MANENLYKDI | FKNV |
| PAC2  | : AACLVNVFKKVL | DDEHLQKEFDNFVHG | FYGF | AKRHNYL | RG  | MANENLYKDI | FKNV |
| PAC6  | : AACLVNVFKKVL | DDEHLQKEFDNFVHG | FYGF | AKRHNYL | RG  | MANENLYKDI | FKNV |
| AMA4  | : AACLVNVFKKVL | DDEHLQKEFDNFVHG | FYGF | AKRHNYL | RG  | MANENLYKDI | FKNV |
| PAC3  | : AACLVNVFKKVL | DDEHLQKEFDNFVHG | FYGF | AKRHNYL | RG  | MANENLYKDI | FKNV |
| AND1  | : AACLVNVFKKVL | DDEHLQKEFDNFVHG | FYGF | AKRHNYL | RG  | MANENLYKDI | FKNV |
| CAR13 | : AACLVNVFKKVL | DDEHLQKEFDNFVHG | FYGF | AKRHNYL | RG  | MANENLYKDI | FKNV |
| AMA5  | : AACLVNVFKKVL | DDEHLQKEFDNFVHG | FYGF | AKRHNYL | RG  | MANENLYKDI | FKNV |
| CAR14 | : AACLVNVFKKVL | DDEHLQKEFDNFVHG | FYGF | AKRHNYL | RG  | MANENLYKDI | FKNV |
| VCG-I | : AACLVNVFKKVL | DDEHLQKEFDNFVHG | FYGF | AKRHNYL | RG  | MANENLYKDI | FKNV |
| AMA2  | : AACLVNVFKKVL | DDEHLQKEFDNFVHG | FYGF | AKRHNYL | RG  | MANENLYKDI | FKNV |
| CAR1  | : AACLVNVFKKVL | DDEHLQKEFDNFVHG | FYGF | AKRHNYL | RG  | MANENLYKDI | FKNV |
| CAR9  | : AACLVNVFKKVL | DDEHLQKEFDNFVHG | FYGF | AKRHNYL | RG  | MANENLYKDI | FKNV |
| AND8  | : AACLVNVFKKVL | DDEHLQKEFDNFVHG | FYGF | AKRHNYL | RG  | MANENLYKDI | FKNV |
| ORI1  | : AACLVNVFKKVL | DDEHLQKEFDNFVHG | FYGF | AKRHNYL | RG  | MANENLYKDI | FKNV |
| AND2  | : AACLVNVFKKVL | DDEHLQKEFDNFVHG | FYGF | AKRHNYL | RG  | MANENLYKDI | FKNV |
| AND3  | : AACLVNVFKKVL | DDEHLQKEFDNFVHG | FYGF | AKRHNYL | RG  | MANENLYKDI | FKNV |
| CAR15 | : AACLVNVFKKVL | DDEHLQKEFDNFVHG | FYGF | AKRHNYL | RG  | MANENLYKDI | FKNV |
| CAR2  | : AACLVNVFKKVL | DDEHLQKEFDNFVHG | FYGF | AKRHNYL | RG  | MANENLYKDI | FKNV |
| CAR4  | : AACLVNVFKKVL | DDEHLQKEFDNFVHG | FYGF | AKRHNYL | RG  | MANENLYKDI | FKNV |
| CAR7  | : AACLVNVFKKVL | DDEHLQKEFDNFVHG | FYGF | AKRHNYL | RG  | MANENLYKDI | FKNV |
| CAR6  | : AACLVNVFKKVL | DDEHLQKEFDNFVHG | FYGF | AKRHNYL | RG  | MANENLYKDI | FKNV |
| CAR5  | : AACLVNVFKKVL | DDEHLQKEFDNFVHG | FYGF | AKRHNYL | RG  | MANENLYKDI | FKNV |
| ORI3  | : AACLVNVFKKVL | DDEHLQKEFDNFVHG | FYGF | AKRHNYL | RG  | MANENLYKDI | FKNV |
| CAR12 | : AACLVNVFKKVL | DDEHLQKEFDNFVHG | FYGF | AKRHNYL | RG  | MANENLYKDI | FKNV |
| CAR3  | : AACLVNVFKKVL | DDEHLQKEFDNFVHG | FYGF | AKRHNYL | RG  | MANENLYKDI | FKNV |
| PAC4  | : AACLVNVFKKVL | DDEHLQKEFDNFVHG | FYGF | AKRHNYL | RG  | MANENLYKDI | FKNV |
| PAC8  | : AACLVNVFKKVL | DDEHLQKEFDNFVHG | FYGF | AKRHNYL | RG  | MANENLYKDI | FKNV |
| ORI4  | : AACLVNVFKKVL | DDEHLQKEFDNFVHG | FYGF | AKRHNYL | RG  | MANENLYKDI | FKNV |
| PAC5  | : AACLVNVFKKVL | DDEHLQKEFDNFVHG | FYGF | AKRHNYL | RG  | MANENLYKDI | FKNV |
|       | AACLVNVFKKVL   | DDEHLQKEFDNFVHG | FYGF | AKRHNYL | RG  | MANENLYKDI | FKNV |
