# Supplementary material for: Genetic Diversity and Selection in Three Plasmodium vivax Merozoite Surface Protein 7 (Pvmsp-7) Genes in a Colombian Population
Source: PubMed Central journal article supplement (PMC3458108; doi:10.1371/journal.pone.0045962), 2012-09-25
Supplement: pone.0045962.s003.pdf [file pone.0045962.s003.pdf]

```
*           120           *           140           *           160           *           180           *           200           *
Sal-I      : EDDLNDYD GDFI GQSKGKFKGHSFKAQKKVEGNDENI-----GGVPVTGNSASNSQSTGGSGSQNASPPQGS PSDSAQGSQVTNST-----GSTVTLN : 196
PAC2      : EDDLNDYD ADFI GQSKGKI KGHSFKAQKKVEGNDENI-----GGVTVTGNSASNSQSTGGSGSQNASQPEGNP PGNPQGTQVTNSA-----GSTVTLS : 196
AMA4      : EDDLNDYD GDFI GQSKGKFKGHSFKAQKKVEGNDENI-----GGVPVTGNSASNSQSTGGSGSQNASPTQGS PSDSAQGSQVTNSA-----GSTVTLS : 196
AND4      : EDDLNDYD GDFI GQSKGKFKGHSFKAQKKVEGNDENI-----GGVPVTGNSASNSQSTGGSGSQNASPTQGS PSDSAQGSQVTNSA-----GSTVTLS : 196
AND1      : EDDLNDYD GDFI GQSKGKFKGHSFKAQKKVEGNDENI-----GGVPVTGNSASNSQSTGGSGSQNASPPQGS PSDSAQGSQVTNSA-----GSTVTLS : 196
PAC3      : EDDLNDYD GDFI GQSKGKFKGHSFKAQKKVEGNDENI-----GGVPVTGNSASNSQSTGGSGSQSDSSPQGS PGNPQGTQVTNSA-----GSTVTLS : 196
CAR5      : EDDLNDYD GDFI GQSKGKFKGHSFKAQKKVEGNDENI FAEAFGGGVPVTGNSASNSQSTGGSGSQSDSSPQGS PGNPQGTQVTNSA-----GSTVTLS : 201
AND5      : EDDLNDYD GDFI GQSKGKFKGHSFKAQKKVEGNDENI-----GGVPVTGNSASNSQSTGGSGSQNASPPQGS PSDSAQGSQVTNST-----GSTVTLN : 196
CAR1      : EDDLNDYD GDFI GQSKGKFKGHSFKAQKKVEGNDENI-----GGVPVTGNSASNSQSTGGSGSQNASPPQGS PSDSAQGSQVTNST-----GSTVTLN : 196
CAR2      : EDDLNDYD GDFI GQSKGKFKGHSFKAQKKVEGNDENI-----GGVPVTGNSASNSQSTGGSGSQNASPPQGS PSDSAQGSQVTNST-----GSTVTLN : 196
ORI3      : EDDLNDYD GDFI GQSKGKFKGHSFKAQKKVEGNDENI-----GGVTVTGNSAT-SPPSGGGGSKSPSQPDNP SDSAQGS P-----GTGGTGGTGGTETLS : 198
PAC7      : EDDLNDYD GDFI GQSKGKFKGHSFKAQKKVEGNDENI-----GGVTVTGNSAT-SPPSGGGGSKSPSQPDNP SDSAQGS P-----GTGGTGGTGGTETLS : 198
PAC4      : EDDLNDYD GDFI GQSKGKFKGHSFKAQKKVEGNDENI-----GGVTVTGNSAT-SPPSGGGGSKSPSQPDNP SDSAQGS P-----GTGGTGGTGGTETLS : 201
PAC5      : EDDLNDYD GDFI GQSKGKFKGHSFKAQKKVEGNDENI-----GGVTVTGNSAT-SPPSGGGGSKSPSQPDNP SDSAQGS P-----GTGGTGGTGGTETLS : 201
AMA2      : EDDLNDYD GDFI GQSKGKFKGHSFKAQKKVEGNDENI-----GGVTVTGNSAT-SPPSGGGGSKSPSQPDNP GGAQGS P--ST-----GGTGGTGGTETLS : 198
AND6      : EDDLNDYD GDFI GQSKGKFKGHSFKAQKKVEGNDENI-----GGVTVTGNSAT-SPPSGGGGSKSPSQPDNP GGAQGS P--ST-----GGTGGTGGTETLS : 198
CAR12     : EDDLNDYD GDFI GQSKGKFKGHSFKAQKKVEGNDENI-----GGVTVTGNSAT-SPPSGGGGSKSPSQPDNP GGAQGS P--ST-----GGTGGTGGTETLS : 198
VCG-I     : EDDLNDYD GDFI GQSKGKI KGHSFKAQKKVEGNDENI-----GGVTVTGNSAS-SQSTGDLNSQNPSQPEGNN GGAQGS P-----GTGGTGGTGGTETLS : 198
PAC1      : EDDLNDYD GDFI GQSKGKI KGHSFKAQKKVEGNDENI-----GGVTVTGNSAS-SQSTGDLNSQNPSQPEGNN GGAQGS P-----GTGGTGGTGGTETLS : 198
ORI1      : EDDLNDYD GDFI GQSKGKFKGHSFKAQKKVEGNDENI-----GGVTVTGNSAS-SQSTGDLNSQNPSQPEGNN GGAQGS P-----GTGGTGGTETLS : 195
CAR4      : EDDLNDYD GDFI GQSKGKFKGHSFKAQKKVEGNDENI-----GGVTVTGNSAS-SQSTGDLNSQNPSQPEGNN GGAQGS P-----GTGGTGGTGGTETLS : 198
AND14     : EDDLNDYD GDFI GQSKGKFKGHSFKAQKKVEGNDENI-----GGVPVTGNSAS-SQSTGDLNSQNPSQPEGNN GGAQGS P-----GTGGTGGTETLS : 195
PAC6      : EDDLNDYD GDFI GQSKGKFKGHSFKAQKKVEGNDENI-----GGVPVTGNSAS-SQSTGDLNSQNPSQPEGNN GGAQGS P-----GTGGTGGTGGTETLS : 198
AND2      : EDDLNDYD GDFI GQSKGKFKGHSFKAQKKVEGNDENI-----GGVTVTGNSAS-SQSTGDLNSQNPSQPEGNN GGAQGS P-----GTGGTGGTGGTETLS : 198
AND7      : EDDLNDYD GDFI GQSKGKFKGHSFKAQKKVEGNDENI-----GGVTVTGNSAS-SQSTGDLNSQNPSQPEGNN GGAQGS P-----GTGGTGGTGGTETLS : 198
AND12     : EDDLNDYD GDFI GQSKGKFKGHSFKAQKKVEGNDENI-----GGVTVTGNSAS-SQSTGDLNSQNPSQPEGNN GGAQGS P-----GTGGTGGTGGTETLS : 198
CAR13     : EDDLNDYD GDFI GQSKGKFKGHSFKAQKKVEGNDENI-----GGVTVTGNSAS-SQSTGDLNSQNPSQPEGNN GGAQGS P-----GTGGTGGTGGTETLS : 198
CAR11     : EDDLNDYD GDFI GQSKGKFKGHSFKAQKKVEGNDENI-----GGVTVTGNSAS-SQSTGDLNSQNPSQPEGNN GGAQGS P-----GTGGTGGTGGTETLS : 198
AND13     : EDDLNDYD GDFI GQSKGKFKGHSFKAQKKVEGNDENI-----GGVTVTGNSAS-SQSTGDLNSQNPSQPEGNN GGAQGS P-----GTGGTGGTGGTETLS : 198
AND10     : EDDLNDYD GDFI GQSKGKFKGHSFKAQKKVEGNDENI-----GGVTVTGNSAS-SQSTGDLNSQNPSQPEGNN GGAQGS P-----GTGGTGGTGGTETLS : 198
CAR8      : EDDLNDYD GDFI GQSKGKFKGHSFKAQKKVEGNDENI-----GGVTVTGNSASNSQSTGGSGSQNASPPQDN PGGGAQGS P-----GTGGTGGTGGTETLS : 199
AND3      : EDDLNDYD GDFI GQSKGKFKGHSFKAQKKVEGNDENI-----GGVPVTGNSASNSQSTGGSGSQNASPPEGNN G GSEQQGPQV-----TEGVTLN : 193
AMA3      : EDDLNDYD GDFI GQSKGKFKGHSFKAQKKVEGNDENI-----GGVPVTGNSASNSQSTGGSGSQNASPTQGS PGNPQGTQVTNSA-----GSTGTLS : 196
AND8      : EDDLNDYD GDFI GQSKGKFKGHSFKAQKKVEGNDENI-----GGVPVTGNSASNSQSTGGSGSQNASPTQGS PGNPQGTQVTNSA-----GSTGTLS : 196
AND9      : EDDLNDYD GDFI GQSKGKFKGHSFKAQKKVEGNDENI FAEAFGGGAPVTGNSAS-SQPAGVSGSQSDSPPQGS PGNPQGTQVTNSA-----GSTGTLS : 200
CAR3      : EDDLNDYD GDFI GQSKGKFKGHSFKAQKKVEGNDENI FAEAFGGGAPVTGNSAS-SQPAGVSGSQSDSPPQGS PGNPQGTQVTNSA-----GSTGTLS : 200
CAR6      : EDDLNDYD GDFI GQSKGKFKGHSFKAQKKVEGNDENI FAEAFGGGAPVTGNSAS-SQPAGVSGSQSDSPPQGS PGNPQGTQVTNSA-----GSTGTLS : 200
AND11     : EDDLNDYD GDFI GQSKGKFKGHSFKAQKKVEGNDENI FAEAFGGGAPVTGNSAS-SQPAGVWGSQSDSPPQGS P GDAQGTQVTNSA-----GSTGTLS : 195
EDDLNDYDgDfIGQSKGKfKfKHSFKAQKKVEGNDENI GGv VTGNSA3 Sg G S S p2 QG T gtggtggtG T Tls
```

```

220          *          240          *          260          *          280          *          300          *          320
Sal-I      : APSSSHSTGQPQCSAGVSLPTGTAE TVASNTAQTSPAGSPGGQAATSGQPESGRVPNVKYL DKLYDEV LKTTDAKDEIHVPPFHSKYNDFRKKYEFTMNEREYQIVK : 304
PAC2      : TSSSSQSTGQSQQSNGAEP P A G T T Q E V N P N A G Q P P P A G S T - G P A A T P G Q P E S G R V P N V K Y L D K L Y D E V L K T T D A K D E I H V P P F H S K Y N D F R K K Y E F T M N E R E Y Q I V K : 303
AMA4      : TSSSSQSTGQSQQSNGAEP P A G T T Q E V N P N A G Q P P P A G S T - G P A A T P G Q P E S G R V P N V K Y L D K L Y D E V L K T T D A K D E I H V P P F H S K Y N D F R K K Y E F T M N E R E Y Q I V K : 303
AND4      : TSSSSQSTGQSQQSNGAEP P A G T T Q E V N P N A G Q P P P A G S T - G P A A T P G Q P E S G R V P N V K Y L D K L Y D E V L K T T D A K D E I H V P P F H S K Y N D F R K K Y E F T M N E R E Y Q I V K : 303
AND1      : TSSSSQSTGQSQQSNGAEP P A G T T Q E V N P N A G Q P P P A G S T - G P A A T P G Q P E S G R V P N V K Y L D K L Y D E V L K T T D A K D E I H V P P F H S K Y N D F R K K Y E F T M N E R E Y Q I V K : 303
PAC3      : TSSSSQSTGQSQQSNGAEP P A G T T Q E V N P N A G Q P P P A G S T - G P A A T P G Q P E S G R V P N V K Y L D K L Y D E V L K T T D A K D E I H V P P F H S K Y N D F R K K Y E F T M N E R E Y Q I V K : 304
CAR5      : TSSSSQSTGQSQQSNGAEP P A G T T Q E V N P N A G Q T S P P A G S P G G Q A A T S G Q P E S G R V P N V K Y L D K L Y D E V L K T T D A K D E I H V P P F H S K Y N D F R K K Y E F T M N E R E Y Q I V K : 309
AND5      : APSSSHSTGQPQCSAGVSLPTGTAE TVASNTAQTSPAGSPGGQAATSGQPESGRVPNVKYL DKLYDEV LKTTDAKDEIHVPPFHSKYNDFRKKYEFTMNEREYQIVK : 304
CAR1      : APSSSHSTGQPQCSAGVSLPTGTAE TVASNTAQTSPAGSPGGQAATSGQPESGRVPNVKYL DKLYDEV LKTTDAKDEIHVPPFHSKYNDFRKKYEFTMNEREYQIVK : 304
CAR2      : APSSSHSTGQPQCSAGVSLPTGTAE TVASNTAQTSPAGSPGGQAATSGQPESGRVPNVKYL DKLYDEV LKTTDAKDEIHVPPFHSKYNDFRKKYEFTMNEREYQIVK : 304
ORI3      : TSSSSHSTGQPQCSAGVSLPTGTAE TVASNTAQTSPAGSPGGQAATSGQPESGRVPNVKYL DKLYDEV LKTTDAKDEIHVPPFHSKYNDFRKKYEFTMNEREYQIVK : 306
PAC7      : TSSSSHSTGQPQCSAGVSLPTGTAE TVASNTAQTSPAGSPGGQAATSGQPESGRVPNVKYL DKLYDEV LKTTDAKDEIHVPPFHSKYNDFRKKYEFTMNEREYQIVK : 306
PAC4      : TSSSSHSTGQPQCSAGVSLPTGTAE TVASNTAQTSPAGSPGGQAATSGQPESGRVPNVKYL DKLYDEV LKTTDAKDEIHVPPFHSKYNDFRKKYEFTMNEREYQIVK : 309
PAC5      : TSSSSHSTGQPQCSAGVSLPTGTAE TVASNTAQTSPAGSPGGQAATSGQPESGRVPNVKYL DKLYDEV LKTTDAKDEIHVPPFHSKYNDFRKKYEFTMNEREYQIVK : 309
AMA2      : TSSSGPSTGGSPSAGVAPSVGNAEAVVTNTEHSSPPAGLPGGQAATPGQPESGRVPNVKYL DKLYDEV LKTTDAKDEIHVPPFHSKYNDFRKKYEFTMNEREYQIVK : 306
AND6      : TSSSGPSTGGSPSAGVAPSVGNAEAVVTNTEHSSPPAGLPGGQAATPGQPESGRVPNVKYL DKLYDEV LKTTDAKDEIHVPPFHSKYNDFRKKYEFTMNEREYQIVK : 306
CAR12     : TSSSGPSTGGSPSAGVAPSVGNAEAVVTNTEHSSPPAGLPGGQAATPGQPESGRVPNVKYL DKLYDEV LKTTDAKDEIHVPPFHSKYNDFRKKYEFTMNEREYQIVK : 306
VCG-I     : TSSSPSTGGSPSAGVSLPTGTAE TVASNTAQTSPAGLPGGQAATPGQPESGRVPNVKYL DKLYDEV LKTTDAKDEIHVPPFHSKYNDFRKKYEFTMNEREYQIVK : 306
PAC1      : TSSSPSTGGSPSAGVSLPTGTAE TVASNTAQTSPAGLPGGQAATPGQPESGRVPNVKYL DKLYDEV LKTTDAKDEIHVPPFHSKYNDFRKKYEFTMNEREYQIVK : 306
ORI1      : TSSSSHSTGQPQCSAGVSLPTGTAE TVASNTAQTSPAGSPGGQAATSGQPESGRVPNVKYL DKLYDEV LKTTDAKDEIHVPPFHSKYNDFRKKYEFTMNEREYQIVK : 303
CAR4      : TSSSSHSTGQPQCSAGVSLPTGTAE TVASNTAQTSPAGSPGGQAATSGQPESGRVPNVKYL DKLYDEV LKTTDAKDEIHVPPFHSKYNDFRKKYEFTMNEREYQIVK : 306
AND14     : TSSSSHSTGQPQCSAGVSLPTGTAE TVASNTAQTSPAGSPGGQAATSGQPESGRVPNVKYL DKLYDEV LKTTDAKDEIHVPPFHSKYNDFRKKYEFTMNEREYQIVK : 303
PAC6      : TSSSSHSTGQPQCSAGVSLPTGTAE TVASNTAQTSPAGSPGGQAATSGQPESGRVPNVKYL DKLYDEV LKTTDAKDEIHVPPFHSKYNDFRKKYEFTMNEREYQIVK : 306
AND2      : TSSSSHSTGQPQCSAGVSLPTGTAE TVASNTAQTSPAGSPGGQAATSGQPESGRVPNVKYL DKLYDEV LKTTDAKDEIHVPPFHSKYNDFRKKYEFTMNEREYQIVK : 306
AND7      : TSSSSHSTGQPQCSAGVSLPTGTAE TVASNTAQTSPAGSPGGQAATSGQPESGRVPNVKYL DKLYDEV LKTTDAKDEIHVPPFHSKYNDFRKKYEFTMNEREYQIVK : 306
AND12     : TSSSSHSTGQPQCSAGVSLPTGTAE TVASNTAQTSPAGSPGGQAATSGQPESGRVPNVKYL DKLYDEV LKTTDAKDEIHVPPFHSKYNDFRKKYEFTMNEREYQIVK : 306
CAR13     : TSSSSHSTGQPQCSAGVSLPTGTAE TVASNTAQTSPAGSPGGQAATSGQPESGRVPNVKYL DKLYDEV LKTTDAKDEIHVPPFHSKYNDFRKKYEFTMNEREYQIVK : 306
CAR11     : TSSSSHSTGQPQCSAGVSLPTGTAE TVASNTAQTSPAGSPGGQAATSGQPESGRVPNVKYL DKLYDEV LKTTDAKDEIHVPPFHSKYNDFRKKYEFTMNEREYQIVK : 306
AND13     : TSSSSHSTGQPQCSAGVSLPTGTAE TVASNTAQTSPAGSPGGQAATSGQPESGRVPNVKYL DKLYDEV LKTTDAKDEIHVPPFHSKYNDFRKKYEFTMNEREYQIVK : 306
AND10     : TSSSSHSTGQPQCSAGVSLPTGTAE TVASNTAQTSPAGSPGGQAATSGQPESGRVPNVKYL DKLYDEV LKTTDAKDEIHVPPFHSKYNDFRKKYEFTMNEREYQIVK : 306
CAR8      : TSSSSHSTGQPQCSAGVSLPTGTAE TVASNTAQTSPAGSPGGQAATSGQPESGRVPNVKYL DKLYDEV LKTTDAKDEIHVPPFHSKYNDFRKKYEFTMNEREYQIVK : 307
AND3      : TSSGPSTGGSPSAGVSLPTGTAE TVASNTAQTSPAGSPGGQAATSGQPESGRVPNVKYL DKLYDEV LKTTDAKDEIHVPPFHSKYNDFRKKYEFTMNEREYQIVK : 301
AMA3      : TSSSSQSTGQSQQSAGVAPSVGNAEAVVTNTEHSSPPAGLPGGQAATSGQPESGRVPNVKYL DKLYDEV LKTTDAKDEIHVPPFHSKYNDFRKKYEFTMNEREYQIVK : 304
AND8      : TSSSSQSTGQSQQSAGVAPSVGNAEAVVTNTEHSSPPAGLPGGQAATSGQPESGRVPNVKYL DKLYDEV LKTTDAKDEIHVPPFHSKYNDFRKKYEFTMNEREYQIVK : 304
AND9      : TSSSSQSTGGSPSAGVALPTGTAE TVASNTAQTSPAGLPGGQAATPGQPESGRVPNVKYL DKLYDEV LKTTDAKDEIHVPPFHSKYNDFRKKYEFTMNEREYQIVK : 308
CAR3      : TSSSSQSTGGSPSAGVALPTGTAE TVASNTAQTSPAGLPGGQAATPGQPESGRVPNVKYL DKLYDEV LKTTDAKDEIHVPPFHSKYNDFRKKYEFTMNEREYQIVK : 308
CAR6      : TSSSSQSTGGSPSAGVALPTGTAE TVASNTAQTSPAGLPGGQAATPGQPESGRVPNVKYL DKLYDEV LKTTDAKDEIHVPPFHSKYNDFRKKYEFTMNEREYQIVK : 308
AND11     : TSSSSQSTGGSPSAGVAPSVGNAEAVVTNTEHSSPPAGLPGGQAATPGQPESGRVPNVKYL DKLYDEV LKTTDAKDEIHVPPFHSKYNDFRKKYEFTMNEREYQIVK : 303
tsSss STGq Q S g p Gt 2 V n q PPAG G AAt GQPESGRVPNVkYL DKLYDEV LKTTDAk1e IHVPPFHSKYNDFRkkyEFTMNEREYQIVK

```

```

              *           340           *           360           *           380           *           400
Sal-I      :  NLFDAFFFKKDGnpsPADAVsFFKKMLNDPNVQKEFDNFVHGlyGfAKRHNYLRGERMTDTKLYDeLLKNVvNLLNTIEvK : 384
PAC2      :  NLFDAFFFKKDGnpsPADAVsFFKKMLNDPNVQKEFDNFVHGlyGfAKRHNYLRGERMTDTNLYDKLLKNVvNLLNTIEvK : 383
AMA4      :  NLFDAFFFKKDGnpsPADAVsFFKKMLNDPNVQKEFDNFVHGlyGfAKRHNYLRGERMTDTKLYDKLLKNVvNLLNTIEvK : 383
AND4      :  NLFDAFFFKKDGnpsPADAVsFFKKMLNDPNVQKEFDNFVHGlyGfAKRHNYLRGERMTDTKLYDeLLKNVvNLLNTIEvK : 383
AND1      :  NLFDAFFFKKDGnpsPADAVsFFKKMLNDPNVQKEFDNFVHGlyGfAKRHNYLRGERMTDTKLYDKLLKNVvNLLNTIEvK : 383
PAC3      :  NLFDAFFFKKDGnpsPADAVsFFKKMLNDPNVQKEFDNFVHGlyGfAKRHNYLRGERMTDTKLYDeLLKNVvNLLNTIEvK : 384
CAR5      :  NLFDAFFFKKDGnpsPADAVsFFKKMLNDPNVQKEFDNFVHGlyGfAKRHNYLRGERMTDTKLYDeLLKNVvNLLNTIEvK : 389
AND5      :  NLFDAFFFKKDGnpsPADAVsFFKKMLNDPNVQKEFDNFVHGlyGfAKRHNYLRGERMTDTKLYDeLLKNVvNLLNTIEvK : 384
CAR1      :  NLFDAFFFKKDGnpsPADAVsFFKKMLNDPNVQKEFDNFVHGlyGfAKRHNYLRGERMTDTKLYDeLLKNVvNLLNTIEvK : 384
CAR2      :  NLFDAFFFKKDGnpsPADAVsFFKKMLNDPNVQKEFDNFVHGlyGfAKRHNYLRGERMTDTKLYDeLLKNVvNLLNTIEvK : 384
ORI3      :  NLFDAFFFKKDGnpsPADAVsFFKKMLNDPNVQKEFDNFVHGlyGfAKRHNYLRGERMTDTQLYDeLLKNVvNLLNTIEvK : 386
PAC7      :  NLFDAFFFKKDGnpsPADAVsFFKKMLNDPNVQKEFDNFVHGlyGfAKRHNYLRGERMTDTQLYDeLLKNVvNLLNTIEvK : 386
PAC4      :  NLFDAFFFKKDGnpsPADAVsFFKKMLNDPNVQKEFDNFVHGlyGfAKRHNYLRGERMTDTQLYDeLLKNVvNLLNTIEvK : 389
PAC5      :  NLFDAFFFKKDGnpsPADAVsFFKKMLNDPNVQKEFDNFVHGlyGfAKRHNYLRGERMTDTQLYDeLLKNVvNLLNTIEvK : 389
AMA2      :  NLFDAFFFKKDGnpsPADAVsFFKKMLNDPNVQKEFDNFVHGlyGfAKRHNYLRGERMTDTNLYDeLLKNVvNLLNTIEvK : 386
AND6      :  NLFDAFFFKKDGnpsPADAVsFFKKMLNDPNVQKEFDNFVHGlyGfAKRHNYLRGERMTDTNLYDeLLKNVvNLLNTIEvK : 386
CAR12     :  NLFDAFFFKKDGnpsPADAVsFFKKMLNDPNVQKEFDNFVHGlyGfAKRHNYLRGERMTDTKLYDKLLKNVvNLLNTIEvK : 386
VCG-I     :  NLFDAFFFKKDGnpsPADAVsFFKKMLNDPNVQKEFDNFVHGlyGfAKRHNYLRGERMTDTQLYDeLLKNVvNLLNTIEvK : 386
PAC1      :  NLFDAFFFKKDGnpsPADAVsFFKKMLNDPNVQKEFDNFVHGlyGfAKRHNYLRGERMTDTQLYDeLLKNVvNLLNTIEvK : 386
ORI1      :  NLFDAFFFKKDGnpsPADAVsFFKKMLNDPNVQKEFDNFVHGlyGfAKRHNYLRGERMTDTKLYDeLLKNVvNLLNTIEvK : 383
CAR4      :  NLFDAFFFKKDGnpsPADAVsFFKKMLNDPNVQKEFDNFVHGlyGfAKRHNYLRGERMTDTQLYDeLLKNVvNLLNTIEvK : 386
AND14     :  NLFDAFFFKKDGnpsPADAVsFFKKMLNDPNVQKEFDNFVHGlyGfAKRHNYLRGERMTDTKLYDeLLKNVvNLLNTIEvK : 383
PAC6      :  NLFDAFFFKKDGnpsPADAVsFFKKMLNDPNVQKEFDNFVHGlyGfAKRHNYLRGERMTDTKLYDeLLKNVvNLLNTIEvK : 386
AND2      :  NLFDAFFFKKDGnpsPADAVsFFKKMLNDPNVQKEFDNFVHGlyGfAKRHNYLRGERMTDTKLYDeLLKNVvNLLNTIEvK : 386
AND7      :  NLFDAFFFKKDGnpsPADAVsFFKKMLNDPNVQKEFDNFVHGlyGfAKRHNYLRGERMTDTKLYDeLLKNVvNLLNTIEvK : 386
AND12     :  NLFDAFFFKKDGnpsPADAVsFFKKMLNDPNVQKEFDNFVHGlyGfAKRHNYLRGERMTDTKLYDeLLKNVvNLLNTIEvK : 386
CAR13     :  NLFDAFFFKKDGnpsPADAVsFFKKMLNDPNVQKEFDNFVHGlyGfAKRHNYLRGERMTDTKLYDeLLKNVvNLLNTIEvK : 386
CAR11     :  NLFDAFFFKKDGnpsPADAVsFFKKMLNDPNVQKEFDNFVHGlyGfAKRHNYLRGERMTDTKLYDeLLKNVvNLLNTIEvK : 386
AND13     :  NLFDAFFFKKDGnpsPADAVsFFKKMLNDPNVQKEFDNFVHGlyGfAKRHNYLRGERMTDTKLYDeLLKNVvNLLNTIEvK : 386
AND10     :  NLFDAFFFKKDGnpsPADAVsFFKKMLNDPNVQKEFDNFVHGlyGfAKRHNYLRGERMTDTKLYDeLLKNVvNLLNTIEvK : 386
CAR8      :  NLFDAFFFKKDGnpsPADAVsFFKKMLNDPNVQKEFDNFVHGlyGfAKRHNYLRGERMTDTKLYDKLLKNVvNLLNTIEvK : 387
AND3      :  NLFDAFFFKKDGnpsPADAVsFFKKMLNDPNVQKEFDNFVHGlyGfAKRHNYLRGERMTDTKLYDeLLKNVvNLLNTIEvK : 381
AMA3      :  NLFDAFFFKKDGnpsPADAVsFFKKMLNDPNVQKEFDNFVHGlyGfAKRHNYLRGERMTDTKLYDeLLKNVvNLLNTIEvK : 384
AND8      :  NLFDAFFFKKDGnpsPADAVsFFKKMLNDPNVQKEFDNFVHGlyGfAKRHNYLRGERMTDTKLYDeLLKNVvNLLNTIEvK : 384
AND9      :  NLFDAFFFKKDGnpsPADAVsFFKKMLNDPNVQKEFDNFVHGlyGfAKRHNYLRGERMTDTKLYDeLLKNVvNLLNTIEvK : 388
CAR3      :  NLFDAFFFKKDGnpsPADAVsFFKKMLNDPNVQKEFDNFVHGlyGfAKRHNYLRGERMTDTKLYDeLLKNVvNLLNTIEvK : 388
CAR6      :  NLFDAFFFKKDGnpsPADAVsFFKKMLNDPNVQKEFDNFVHGlyGfAKRHNYLRGERMTDTKLYDeLLKNVvNLLNTIEvK : 388
AND11     :  NLFDAFFFKKDGnpsPADAVsFFKKMLNDPNVQKEFDNFVHGlyGfAKRHNYLRGERMTDTKLYDeLLKNVvNLLNTIEvK : 383
nLfDAfFkKDGnpsPADAVsFFKKMLNDPNVQKEFDNFVHGlyGfAKRHNYLRGERMTDT LYDeLLKNVvNLLNTIEvK
```
