# Supplementary material for: Genetic Diversity and Selection in Three Plasmodium vivax Merozoite Surface Protein 7 (Pvmsp-7) Genes in a Colombian Population
Source: PubMed Central journal article supplement (PMC3458108; doi:10.1371/journal.pone.0045962), 2012-09-25
Supplement: pone.0045962.s004.pdf [file pone.0045962.s004.pdf]

|       | 120                    | *           | 140        | *       | 160         | *     | 180          | *                                          | 200 | *   | 220 |  |
|-------|------------------------|-------------|------------|---------|-------------|-------|--------------|--------------------------------------------|-----|-----|-----|--|
| Sal-I | : DLDNYDADFIGQGKKIITKG | AADKEEEEEED | DEDEEAVEGD | -----   | EEAGERD     | ----  | EAAEAEAVRGD  | TSHQSGSGDLTPSPPGSSERAPAVAPGETPRVTATSQGPSQT | :   | 209 |     |  |
| AND11 | : DLDNYDADFIGQGKKIITKG | AADKEEEEEED | DEDEEAVEGD | -----   | EEAGERD     | ----  | EAAEAEAVRGD  | TSHQSGSGDLTPSPPGSSERAPAVAPGETPRDTATSQGPSQT | :   | 203 |     |  |
| CAR12 | : DLDNYDADFIGQGKKIITKG | AADKEEEEEED | DEDEEAVEGD | -----   | EEAGERDEA   | ----  | EAAEAEAVRGD  | TSHQSGSGDLTPSPPGSSERAPAVAPGETPRVTATSQGPSQT | :   | 205 |     |  |
| AND6  | : DLDNYDADFIGQGKKIITKG | AADKEEEEEED | DEDEEAVEGD | -----   | EEAGERDEA   | ----  | EAAEAEAVRGD  | TSHQSGSGDLTPSPPGSSERAPAVAPGETPRVTATSQGPSQT | :   | 205 |     |  |
| AMA5  | : DLDNYDADFIGQGKKIITKG | AADKEEEEEED | DEDEEAVEGD | -----   | EEAGERDEAEA | ----  | EAAEAEAVRGD  | TSHQSGSGDLTPSPPGSSERAPAVAPGETPRVTATSQGPSQT | :   | 207 |     |  |
| AND1  | : DLDNYDADFIGQGKKIITKG | AADKEEEEEED | DEDEEAVEGD | -----   | EEAGERDEA   | ----  | EAAEAEAVRGD  | TSHQSGSGDLTPSPPGSSERAPAVAPGETPRVTATSQGPSQT | :   | 205 |     |  |
| AND5  | : DLDNYDADFIGQGKKIITKG | AADKEEEEEED | DEDEEAVEGD | -----   | EEAGERD     | ----  | EAAEAEAVRGD  | TSHQSGSGDLTPSPPGSSERAPAVAPGETPRVTATSQGPSQT | :   | 203 |     |  |
| CAR11 | : DLDNYDADFIGQGKKIITKG | AADKEEEEEED | DEDEEAVEGD | -----   | EEAGERD     | ----  | EAAEAEAVRGD  | TSHQSGSGDLTPSPPGSSERAPAVAPGETPRVTATSQGPSQT | :   | 203 |     |  |
| AND12 | : DLDNYDADFIGQGKKIITKG | AADKEEEEEED | DEDEEAVEGD | -----   | EEAGERD     | ----  | EAAEAEAVRGD  | TSHQSGSGDLTPSPPGSSERAPAVAPGETPRVTATSQGPSQT | :   | 203 |     |  |
| ORI3  | : DLDNYDADFIGQGKKIITKG | AADKEEEEEED | DEDEEAVEGD | -----   | EEAGERD     | ----  | EAAEAEAVRGD  | TSHQSGSGDLTPSPPGSSERAPAVAPGETPRDTATSQGPSQT | :   | 203 |     |  |
| AND9  | : DLDNYDADFIGQGKKIITKG | AADKEEEEEED | DEDEEAVEGD | -----   | EEAGERD     | ----  | EAAEAEAVRGD  | TSHQSGSGDLTPSPPGSSERAPAVAPGETPRDTATSQGPSQT | :   | 203 |     |  |
| PAC6  | : DLDNYDADFIGQGKKIITKG | AADKEEEEEED | DEDEEAVEGD | -----   | EEAGERD     | ----  | EAAEAEAVRGD  | TSHQSGSGDLTPSPPGSSERAPAVAPGETPRDTATSQGPSQT | :   | 203 |     |  |
| VCG-I | : DLDNYDADFIGQGKKIITKG | AADKEEEEEED | DEDEEAVEGD | -----   | EEAGERD     | ----  | EAAEAEAVRGD  | TSHQSGSGDLTPSPPGSSERAPAVAPGETPRDTATSQGPSQT | :   | 203 |     |  |
| PAC1  | : DLDNYDADFIGQGKKIITKG | AADKEEEEEED | DEDEEAVEGD | -----   | EEAGERD     | ----  | EAAEAEAVRGD  | TSHQSGSGDLTPSPPGSSERAPAVAPGETPRDTATSQGPSQT | :   | 203 |     |  |
| ORI2  | : DLDNYDADFIGQGKKIITKG | AADKEEEEEED | DEDEEAVEGD | -----   | EEAGERDEA   | ----  | EAAEAEAVRGD  | TSHQSGSGDLTPSPPGSSERAPAVAPGETPRVTATSQGPSQT | :   | 205 |     |  |
| CAR2  | : DLDNYDADFIGQGKKIITKG | AADKEEEEEED | DEDEEAVEGD | -----   | EEAGERD     | ----  | EAAEAEAVRGD  | TSHQSGSGDLTPSPPGSSERAPAVAPGETPRVTATSQGPSQT | :   | 203 |     |  |
| CAR4  | : DLDNYDADFIGQGKKIITKG | AADKEEEEEED | DEDEEAVEGD | -----   | EEAGERD     | ----  | EAAEAEAVRGD  | TSHQSGSGDLTPSPPGSSERAPAVAPGETPRVTATSQGPSQT | :   | 203 |     |  |
| ORI1  | : DLDNYDADFIGQGKKIITKG | AADKEEEEEED | DEDEEAVEGD | -----   | EEAGERD     | ----  | EAAEAEAVRGD  | TSHQSGSGDLTPSPPGSSERAPAVAPGETPRVTATSQGPSQT | :   | 203 |     |  |
| AND7  | : DLDNYDADFIGQGKKIITKG | AADKEEEEEED | DEDEEAVEGD | -----   | EEAGERD     | ----  | EAAEAEAVRGD  | TSHQSGSGDLTPSPPGSSERAPAVAPGETPRVTATSQGPSQT | :   | 203 |     |  |
| AND2  | : DLDNYDADFIGQGKKIITKG | AADKEEEEEED | DEDEEAVEGD | -----   | EEAGERD     | ----  | EAAEAEAVRGD  | TSHQSGSGDLTPSPPGSSERAPAVAPGETPRVTATSQGPSQT | :   | 203 |     |  |
| CAR5  | : DLDNYDADFIGQGKKIITKG | AADKEEEEEED | DEDEEAVEGD | -----   | EEAGERD     | ----  | EAAEAEAVRGD  | TSHQSGSGDLTPSPPGSSERAPAVAPGETPRVTATSQGPSQT | :   | 203 |     |  |
| CAR6  | : DLDNYDADFIGQGKKIITKG | AADKEEEEEED | DEDEEAVEGD | -----   | EEAGERD     | ----  | EAAEAEAVRGD  | TSHQSGSGDLTPSPPGSSERAPAVAPGETPRVTATSQGPSQT | :   | 203 |     |  |
| CAR3  | : DLDNYDADFIGQGKKIITKG | AADKEEEEEED | DEDEEAVEGD | -----   | EEAGERD     | ----  | EAAEAEAVRGD  | TSHQSGSGDLTPSPPGSSERAPAVAPGETPRDTATSQGPSQT | :   | 203 |     |  |
| AND13 | : DLDNYDADFIGQGKKIITKG | AADKEEEEEED | DEDEEAVEGD | -----   | EEAGERD     | ----  | EAAEAEAVRGD  | TSHQSGSGDLTPSPPGSSERAPAVAPGETPRVTATSQGPSQT | :   | 203 |     |  |
| AND10 | : DLDNYDADFIGQGKKIITKG | AADKEEEEEED | DEDEEAVEGD | -----   | EEAGERD     | ----  | EAAEAEAVRGD  | TSHQSGSGDLTPSPPGSSERAPAVAPGETPRVTATSQGPSQT | :   | 203 |     |  |
| CAR13 | : DLDNYDADFIGQGKKIITKG | AADKEEEEEED | DEDEEAVEGD | -----   | EEAGERD     | ----  | EAAEAEAVRGD  | TSHQSGSGDLTPSPPGSSERAPAVAPGETPRVTATSQGPSQT | :   | 203 |     |  |
| PAC3  | : DLDNYDADFIGQGKKIITKG | AADKEEEEEED | DEDEEAVEGD | -----   | EEAGERD     | ----  | EAAEAEAVRGD  | TSHQSGSGDLTPSPPGSSERAPAVAPGETPRVTATSQGPSQT | :   | 203 |     |  |
| CAR10 | : DLDNYDADFIGQGKKIITKG | AADKEEEEEED | DEDEEAVEGD | EEAVEGD | EEAGEED     | ----  | EAAEAEAVRGD  | TSHQSGSGDLTPSPPGSSERAPAVAPGETPRVTATSQGPSQT | :   | 210 |     |  |
| CAR8  | : DLDNYDADFIGQGKKIITKG | AVDSNEEDGG  | DEDEEAVEGD | EA      | EAGEEG      | ----  | EEEATNEVASHQ | SDSEASGESDPASGELAPATARGETATDSPTSQEPSQT     | :   | 202 |     |  |
| PAC4  | : DLDNYDADFIGQGKKIITKG | VVDSNEEDGG  | DEDEEAVEGD | EA      | EAGEEG      | ----  | EEEATNEVASHQ | SDSEASGESDPASGELAPATARGENATDSPTSQEPSQT     | :   | 202 |     |  |
| PAC5  | : DLDNYDADFIGQGKKIITKG | VVDSNEEDGG  | DEDEEAVEGD | EA      | EAGEEG      | ----  | EEEATNEVASHQ | SDSEASGESDPASGELAPATARGENATDSPTSQEPSQT     | :   | 202 |     |  |
| AMA3  | : DLDNYDADFIGQGKKIITKG | VVDSNEEDGG  | DEDEEAVEGD | EA      | EAGEEG      | ----  | EEEATNEVASHQ | SDSEASGESDPASGELAPATARGENATDSPTSQEPSQT     | :   | 202 |     |  |
| AND3  | : DLDNYDADFIGQGKKIITKG | VVDSNEEDGG  | DEDEEAVEGD | EA      | EAGEEG      | ----  | EEEATNEVASHQ | SDSEASGESDPASGELAPATARGENATDSPTSQEPSQT     | :   | 202 |     |  |
| ORI4  | : DLDNYDADFIGQGKKIITKG | AVDSNEEDGG  | DEDEEAVEGD | EA      | EAGEEG      | ----  | EEEATNEVASHQ | SDSEASGESDPASGEVAPATARGENATDSPTSQEPSQT     | :   | 202 |     |  |
| CAR1  | : DLDNYDADFIGQGKKIITKG | AVDSNEEDGG  | DEDEEAVEGD | EA      | EAGEEG      | ----  | EEEATNEVASHQ | SDSEASGESDPASGEVAPATARGENATDSPTSQEPSQT     | :   | 202 |     |  |
| AND8  | : DLDNYDADFIGQGKKIITKG | AVDSNEEDGG  | DEDEEAVEGD | EA      | EAGEEG      | ----  | EEEATNEVASHQ | SDSEASGESDPASGEVAPATARGENATDSPTSQEPSQT     | :   | 202 |     |  |
| ORI5  | : DLDNYDADFIGQGKKIITKG | AVDSNEEDGG  | DEDEEAVEGD | EA      | EAGEEG      | ----  | EEEATNEVASHQ | SDSEASGESDPASGEVAPATARGENATDSPTSQEPSQT     | :   | 202 |     |  |
| PAC7  | : DLDNYDADFIGQGKKIITKG | AVDSNEEDGG  | DEDEEAVEGD | EA      | EAGEEG      | ----  | EEEATNEVASHQ | SDSAVSPRSVSEREPATATVPAETARDNPPSQETAPT      | :   | 202 |     |  |
| PAC2  | : DLDNYDADFIGQGKKIITKG | AVDSNEEDGG  | DEDEEAVEGD | EA      | EAGEEG      | ----  | EEEATNEVASHQ | SDSAVSPRSVSEREPATATAPGETARDNPPSQETAPT      | :   | 202 |     |  |
| PAC8  | : DLDNYDADFIGQGKKIITKG | AASSEEGEED  | EEDEDED    | -----   | GEAGQET     | ----- | DKGSTSDQPDS  | AVSPQRAPESPELTTATARGATVRDSPTS PGLSPT       | :   | 193 |     |  |
| CAR7  | : DLDNYDADFIGQGKKIITKG | AASSEEGEED  | EEDEDED    | -----   | GEAGQET     | ----- | DKGSTSDQPDS  | AVSPQRAPESPELTTATARGATVRDSPTS PGLSPT       | :   | 193 |     |  |
| AMA4  | : DLDNYDADFIGQGKKIITKG | AASSEEGEED  | EEDEDED    | -----   | GEAGQET     | ----- | DKGSTSDQPDS  | AVSPQRAPESPELTTATARGATVRDSPTS PGLSPT       | :   | 193 |     |  |
| AND4  | : DLDNYDADFIGQGKKIITKG | AASSEEGEED  | EEDEDED    | -----   | GEAGQET     | ----- | DKGSTSDQPDS  | AVSPQRAPESPELTTATARGATVRDSPTS PGLSPT       | :   | 193 |     |  |

dLDNYDADFIGQGKKIITKGa d Ee dedEEavEgd eag e ea ShQs S s p S E apA a get tSq psqT



340 \* 360 \* 380 \*

Sal-I : NPSPADAVSFFKKMLNDPNVQKEFDNFVHGGLYGFAKRHNYLRDERMNLTDHAKSLFVNTLSLLDTL : 385  
AND11 : NPSPADAVSFFKKMLNDPNVQKEFDNFVHGGLYGFAKRHNYLRDERMNLTDHAKSLFVNTLSLLDTL : 379  
CAR12 : NPSPADAVSFFKKMLNDPNVQKEFDNFVHGGLYGFAKRHNYLRDERMNLTDHAKSLFVNTLSLLDTL : 381  
AND6 : NPSPADAVSFFKKMLNDPNVQKEFDNFVHGGLYGFAKRHNYLRDERMNLTDHAKSLFVNTLSLLDTL : 381  
AMA5 : NPSPADAVSFFKKMLNDPNVQKEFDNFVHGGLYGFAKRHNYLRDERMNLTDHAKSLFVNTLSLLDTL : 383  
AND1 : NPSPADAVSFFKKMLNDPNVQKEFDNFVHGGLYGFAKRHNYLRDERMNLTDHAKSLFVNTLSLLDTL : 381  
AND5 : NPSPADAVSFFKKMLNDPNVQKEFDNFVHGGLYGFAKRHNYLRDERMNLTDHAKSLFVNTLSLLDTL : 379  
CAR11 : NPSPADAVSFFKKMLNDPNVQKEFDNFVHGGLYGFAKRHNYLRDERMNLTDHAKSLFVNTLSLLDTL : 379  
AND12 : NPSPADAVSFFKKMLNDPNVQKEFDNFVHGGLYGFAKRHNYLRDERMNLTDHAKSLFVNTLSLLDTL : 379  
ORI3 : NPSPADAVSFFKKMLNDPNVQKEFDNFVHGGLYGFAKRHNYLRGERMNLTDHAKSLFVNTLSLLDTL : 379  
AND9 : NPSPADAVSFFKKMLNDPNVQKEFDNFVHGGLYGFAKRHNYLRGERMNLTDHAKSLFVNTLSLLDTL : 379  
PAC6 : NPSPADAVSFFKKMLNDPNVQKEFDNFVHGGLYGFAKRHNYLRDERMNLTDHAKSLFVNTLSLLDTL : 379  
VCG-I : NPSPADAVSFFKKMLNDPNVQKEFDNFVHGGLYGFAKRHNYLRDERMNLTDHAKSLFVNTLSLLDTL : 379  
PAC1 : NPSPADAVSFFKKMLNDPNVQKEFDNFVHGGLYGFAKRHNYLRDERMNLTDHAKSLFVNTLSLLDTL : 379  
ORI2 : NPSPADAVSFFKKMLNDPNVQKEFDNFVHGGLYGFAKRHNYLRDERMNLTDHAKSLFVNTLSLLDTL : 381  
CAR2 : NPSPADAVSFFKKMLNDPNVQKEFDNFVHGGLYGFAKRHNYLRDERMNLTDHAKSLFVNTLSLLDTL : 379  
CAR4 : NPSPADAVSFFKKMLNDPNVQKEFDNFVHGGLYGFAKRHNYLRDERMNLTDHAKSLFVNTLSLLDTL : 379  
ORI1 : NPSPADAVSFFKKMLNDPNVQKEFDNFVHGGLYGFAKRHNYLRDERMNLTDHAKSLFVNTLSLLDTL : 379  
AND7 : NPSPADAVSFFKKMLNDPNVQKEFDNFVHGGLYGFAKRHNYLRDERMNLTDHAKSLFVNTLSLLDTL : 379  
AND2 : NPSPADAVSFFKKMLNDPNVQKEFDNFVHGGLYGFAKRHNYLRDERMNLTDHAKSLFVNTLSLLDTL : 379  
CAR5 : NPSPADAVSFFKKMLNDPNVQKEFDNFVHGGLYGFAKRHNYLRDERMNLTDHAKSLFVNTLSLLDTL : 379  
CAR6 : NPSPADAVSFFKKMLNDPNVQKEFDNFVHGGLYGFAKRHNYLRDERMNLTDHAKSLFVNTLSLLDTL : 379  
CAR3 : NPSPADAVSFFKKMLNDPNVQKEFDNFVHGGLYGFAKRHNYLRGERMNLTDHAKSLFVNTLSLLDTL : 379  
AND13 : NPSPADAVSFFKKMLNDPNVQKEFDNFVHGGLYGFAKRHNYLRDERMNLTDHAKSLFVNTLSLLDTL : 379  
AND10 : NPSPADAVSFFKKMLNDPNVQKEFDNFVHGGLYGFAKRHNYLRDERMNLTDHAKSLFVNTLSLLDTL : 379  
CAR13 : NPSPADAVSFFKKMLNDPNVQKEFDNFVHGGLYGFAKRHNYLRDERMNLTDHAKSLFVNTLSLLDTL : 379  
PAC3 : NPSPADAVSFFKKMLNDPNVQKEFDNFVHGGLYGFAKRHNYLRDERMNLTDHAKSLFVNTLSLLDTL : 379  
CAR10 : NPSPADAVSFFKKMLNDPNVQKEFDNFVHGGLYGFAKRHNYLRDERMNLTDHAKSLFVNTLSLLDTL : 386  
CAR8 : NPSPADAVSFFKKMLNDPNVQKEFDNFVHGGLYGFAKRHNYLRGERMNLTDHAKSLFVNTLSLLDTL : 378  
PAC4 : NPSPADAVSFFKKMLNDPNVQKEFDNFVHGGLYGFAKRHNYLRDERMNLTDHAKSLFVNTLSLLDTL : 378  
PAC5 : NPSPADAVSFFKKMLNDPNVQKEFDNFVHGGLYGFAKRHNYLRDERMNLTDHAKSLFVNTLSLLDTL : 378  
AMA3 : NPSPADAVSFFKKMLNDPNVQKEFDNFVHGGLYGFAKRHNYLRDERMNLTDHAKSLFVNTLSLLDTL : 378  
AND3 : NPSPADAVSFFKKMLNDPNVQKEFDNFVHGGLYGFAKRHNYLRDERMNLTDHAKSLFVNTLSLLDTL : 378  
ORI4 : NPSPADAVSFFKKMLNDPNVQKEFDNFVHGGLYGFAKRHNYLRDERMNLTDHAKSLFVNTLSLLDTL : 378  
CAR1 : NPSPADAVSFFKKMLNDPNVQKEFDNFVHGGLYGFAKRHNYLRDERMNLTDHAKSLFVNTLSLLDTL : 378  
AND8 : NPSPADAVSFFKKMLNDPNVQKEFDNFVHGGLYGFAKRHNYLRDERMNLTDHAKSLFVNTLSLLDTL : 378  
ORI5 : NPSPADAVSFFKKMLNDPNVQKEFDNFVHGGLYGFAKRHNYLRDERMNLTDHAKSLFVNTLSLLDTL : 378  
PAC7 : NPSPADAVSFFKKMLNDPNVQKEFDNFVHGGLYGFAKRHNYLRDERMNLTDHAKSLFVNTLSLLDTL : 378  
PAC2 : NPSPADAVSFFKKMLNDPNVQKEFDNFVHGGLYGFAKRHNYLRDERMNLTDHAKSLFVNTLSLLDTL : 378  
PAC8 : NPSPADAVSFFKKMLNDPNVQKEFDNFVHGGLYGFAKRHNYLRDERMNLTDHAKSLFVNTLSLLDTL : 369  
CAR7 : NPSPADAVSFFKKMLNDPNVQKEFDNFVHGGLYGFAKRHNYLRGERMNLTDHAKSLFVNTLSLLDTL : 369  
AMA4 : NPSPADAVSFFKKMLNDPNVQKEFDNFVHGGLYGFAKRHNYLRDERMNLTDHAKSLFVNTLSLLDTL : 369  
AND4 : NPSPADAVSFFKKMLNDPNVQKEFDNFVHGGLYGFAKRHNYLRDERMNLTDHAKSLFVNTLSLLDTL : 369  
NPSPADAVSFFKKMLNDPNVQKEFDNFVHGGLYGFAKRHNYLRDERMNLTDHAKSLFVNTLSLLDTL
