# Supplementary material for: Genetic Diversity and Selection in Three Plasmodium vivax Merozoite Surface Protein 7 (Pvmsp-7) Genes in a Colombian Population
Source: PubMed Central journal article supplement (PMC3458108; doi:10.1371/journal.pone.0045962), 2012-09-25
Supplement: pone.0045962.s010.pdf [file pone.0045962.s010.pdf]

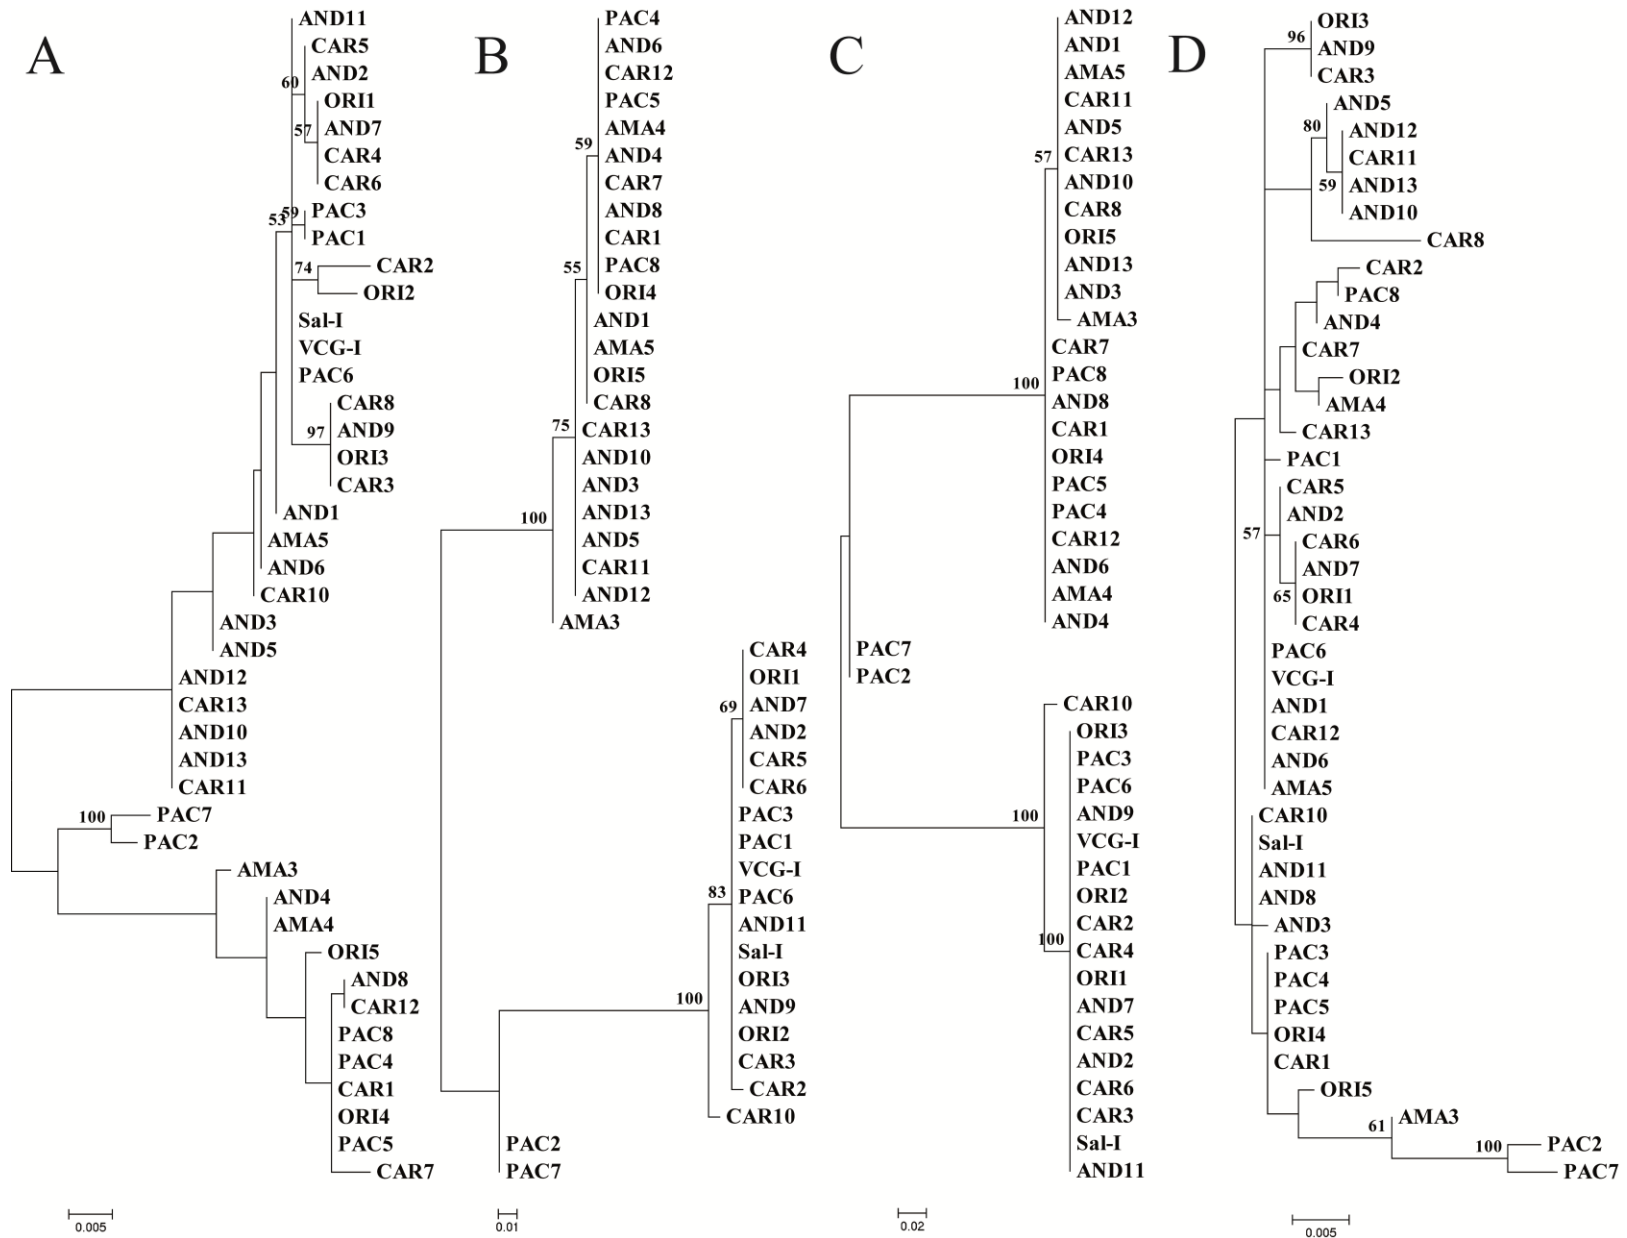

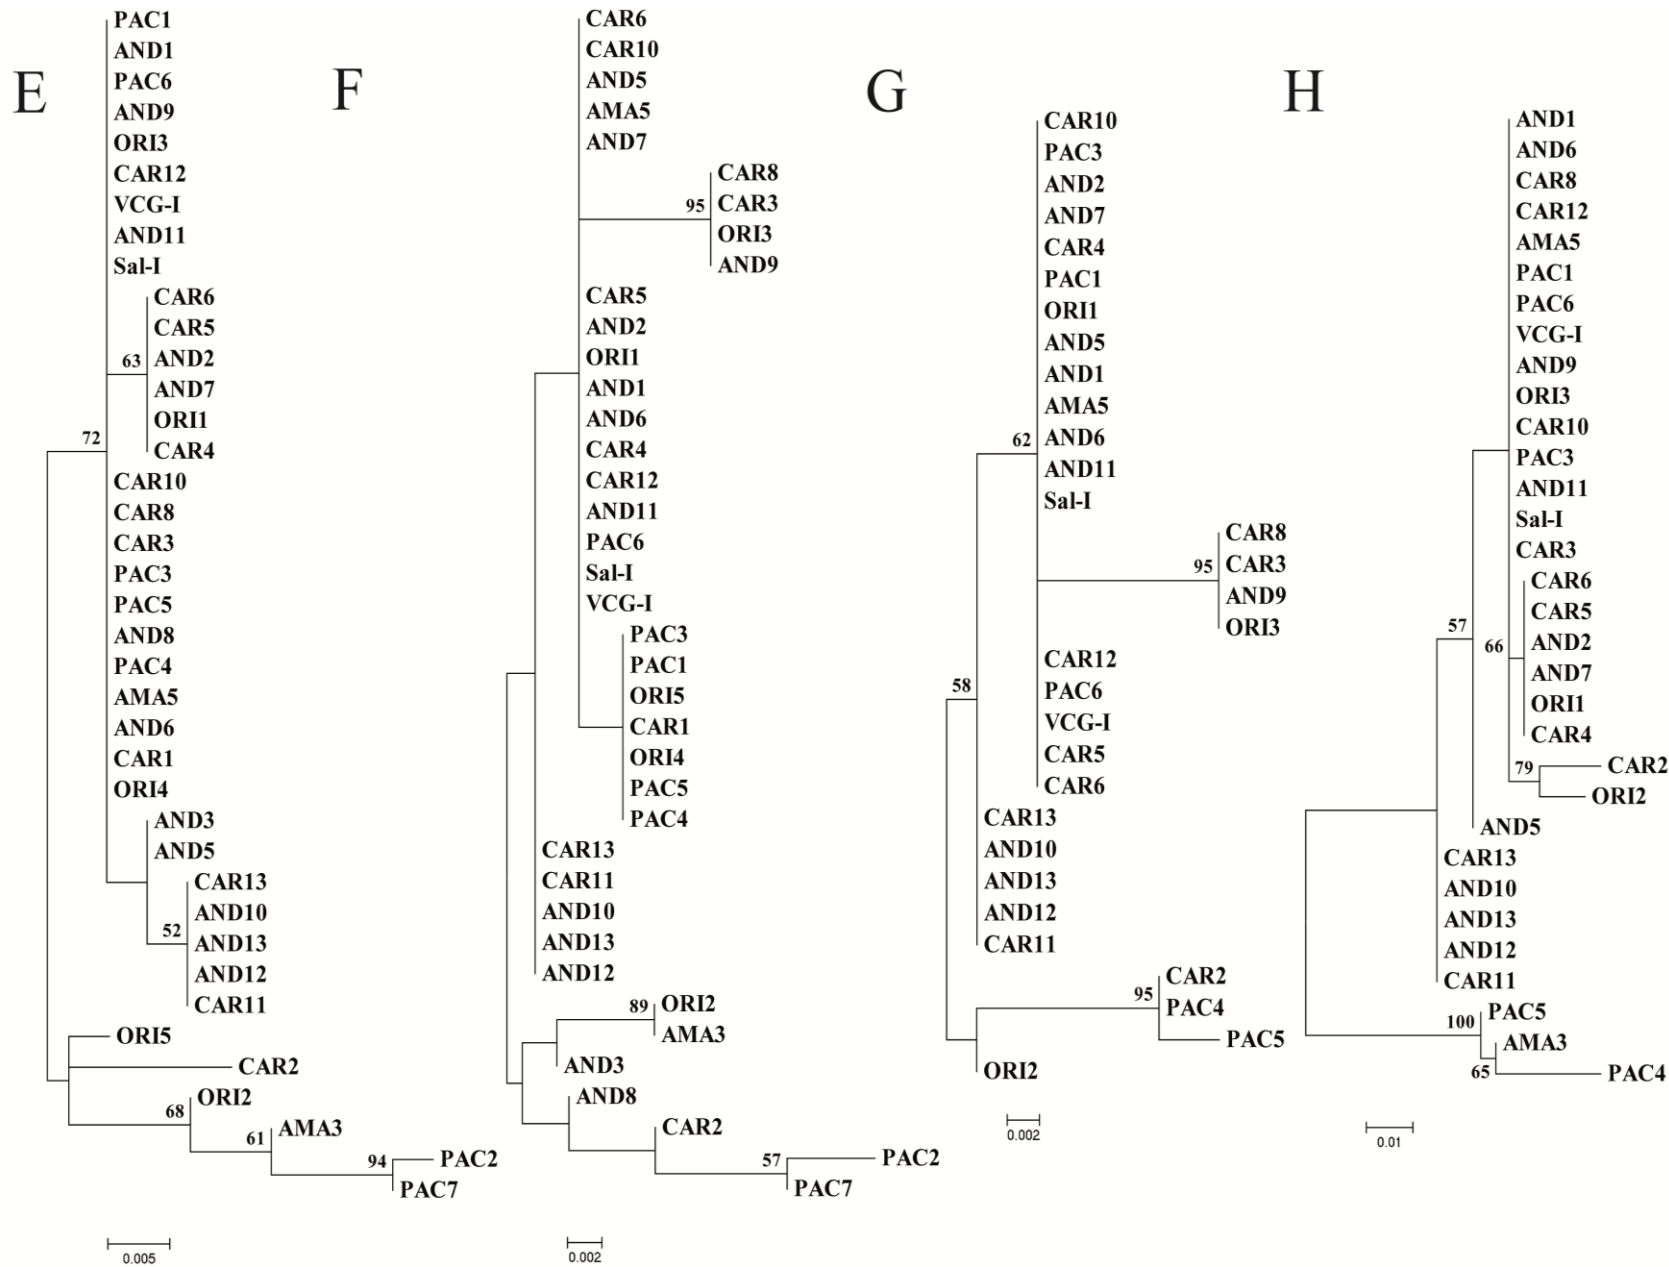

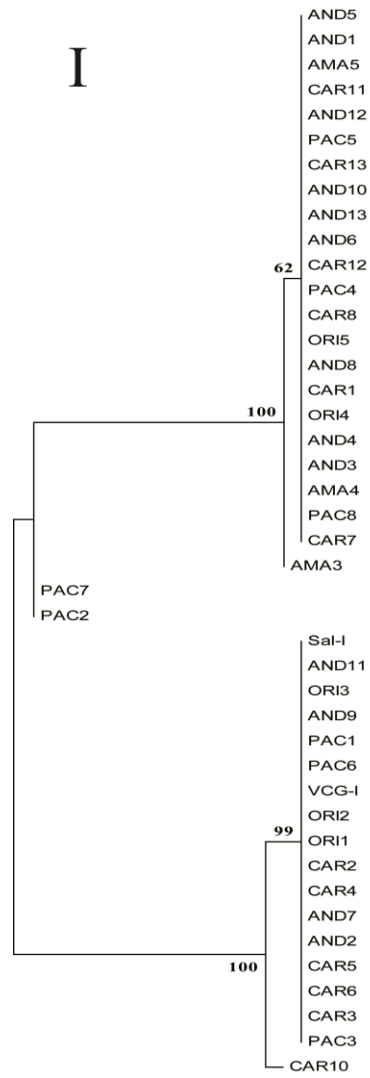

0.02

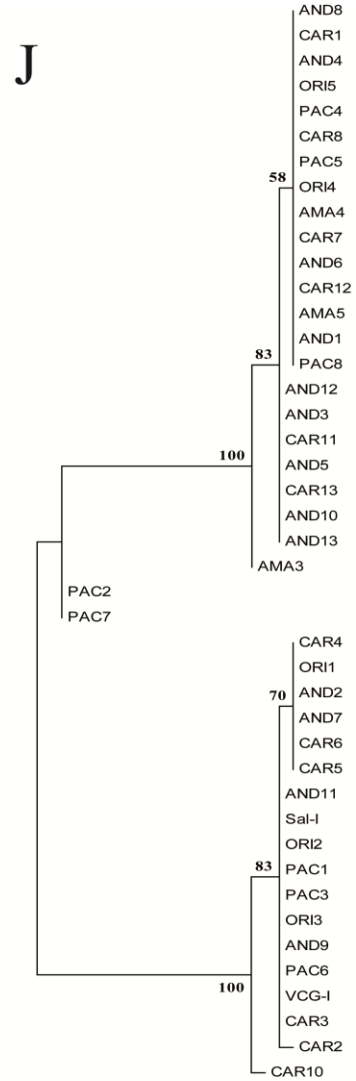

0.01
