# Supplementary material for: Genetic Diversity and Selection in Three Plasmodium vivax Merozoite Surface Protein 7 (Pvmsp-7) Genes in a Colombian Population
Source: PubMed Central journal article supplement (PMC3458108; doi:10.1371/journal.pone.0045962), 2012-09-25
Supplement: pone.0045962.s013.pdf [file pone.0045962.s013.pdf]

CAR9\_C : -----IFFLSFSFLISFHSVLSEKLGIQKKKKNLEQDAMHALMKKLESYKLSATDNSEIFNKEMEALKKQIDQLQOHGGANEESLGHLLSEEAANESTKKTIFGVD : 103  
AND8\_C : -----IFFLSFSFLISFHSVLSEKLGIQKKKKNLEQDAMHALMKKLESYKLSATDNSEIFNKEMEALKKQIDQLQOHGGANEESLGHLLSEEAANESTKKTIFGVD : 103  
ORI1\_C : -----IFFLSFSFLISFHSVLSEKLGIQKKKKNLEQDAMHALMKKLESYKLSATDNSEIFNKEMEALKKQIDQLQOHGGANEESLGHLLSEEAANESTKKTIFGVD : 103  
AND2\_C : -----IFFLSFSFLISFHSVLSEKLGIQKKKKNLEQDAMHALMKKLESYKLSATDNSEIFNKEMEALKKQIDQLQOHGGANEESLGHLLSEEAANESTKKTIFGVD : 103  
AND3\_C : -----IFFLSFSFLISFHSVLSEKLGIQKKKKNLEQDAMHALMKKLESYKLSATDNSEIFNKEMEALKKQIDQLQOHGGANEESLGHLLSEEAANESTKKTIFGVD : 103  
CAR15\_C : -----IFFLSFSFLISFHSVLSEKLGIQKKKKNLEQDAMHALMKKLESYKLSATDNSEIFNKEMEALKKQIDQLQOHGGANEESLGHLLSEEAANESTKKTIFGVD : 103  
CAR2\_C : -----IFFLSFSFLISFHSVLSEKLGIQKKKKNLEQDAMHALMKKLESYKLSATDNSEIFNKEMEALKKQIDQLQOHGGANEESLGHLLSEEAANESTKKTIFGVD : 103  
CAR4\_C : -----IFFLSFSFLISFHSVLSEKLGIQKKKKNLEQDAMHALMKKLESYKLSATDNSEIFNKEMEALKKQIDQLQOHGGANEESLGHLLSEEAANESTKKTIFGVD : 103  
CAR7\_C : -----IFFLSFSFLISFHSVLSEKLGIQKKKKNLEQDAMHALMKKLESYKLSATDNSEIFNKEMEALKKQIDQLQOHGGANEESLGHLLSEEAANESTKKTIFGVD : 103  
CAR6\_C : -----IFFLSFSFLISFHSVLSEKLGIQKKKKNLEQDAMHALMKKLESYKLSATDNSEIFNKEMEALKKQIDQLQOHGGANEESLGHLLSEEAANESTKKTIFGVD : 103  
CAR5\_C : -----IFFLSFSFLISFHSVLSEKLGIQKKKKNLEQDAMHALMKKLESYKLSATDNSEIFNKEMEALKKQIDQLQOHGGANEESLGHLLSEEAANESTKKTIFGVD : 103  
ORI3\_C : -----IFFLSFSFLISFHSVLSEKLGIQKKKKNLEQDAMHALMKKLESYKLSATDNSEIFNKEMEALKKQIDQLQOHGGANEESLGHLLSEEAANESTKKTIFGVD : 103  
CAR12\_C : -----IFFLSFSFLISFHSVLSEKLGIQKKKKNLEQDAMHALMKKLESYKLSATDNSEIFNKEMEALKKQIDQLQOHGGANEESLGHLLSEEAANESTKKTIFGVD : 103  
PAC4\_C : -----IFFLSFSFLISFHSVLSEKLGIQKKKKNLEQDAMHALMKKLESYKLSATDNSEIFNKEMEALKKQIDQLQOHGGANEESLGHLLSEEAADSSKKTIFGVD : 103  
CAR3\_C : -----IFFLSFSFLISFHSVLSEKLGIQKKKKNLEQDAMHALMKKLESYKLSATDNSEIFNKEMEALKKQIDQLQOHGGANEESLGHLLSEEAADSSKKTIFGVD : 103  
PAC8\_C : -----IFFLSFSFLISFHSVLSEKLGIQKKKKNLEQDAMHALMKKLESYKLSATDNSEIFNKEMEALKKQIDQLQOHGGANEESLGHLLSEEAADSSKKTIFGVD : 103  
ORI4\_C : -----IFFLSFSFLISFHSVLSEKLGIQKKKKNLEQDAMHALMKKLESYKLSATDNSEIFNKEMEALKKQIDQLQOHGGANEESLGHLLSEEAANDSSKKTIFGVD : 103  
PAC5\_C : -----IFFLSFSFLISFHSVLSEKLGIQKKKKNLEQDAMHALMKKLESYKLSATDNSEIFNKEMEALKKQIDQLQOHGGANEESLGHLLSEEAADSSKKTIFGVD : 103  
PAC2\_C : -----IFFLSFSFLISFHSVLSEKLGIQKKKKNLEQDATHALMKKLESYKLSATDNSEIFNKEIESLKKQIDQLHQHGGANEESLGHLLSEEAADSSGKKTIFGVD : 103  
PAC6\_C : -----IFFLSFSFLISFHSVLSEKLGIQKKKKNLEQDATHALMKKLESYKLSATDNSEIFNKEIESLKKQIDQLHQHGGANEESLGHLLSEEAADSSGKKTIFGVD : 103  
PAC3\_C : -----IFFLSFSFLISFHSVLSEKLGIQKKKKNLEQDAMHALMKKLESYKLSATDNSEIFNKEMEALKKQIDQLQOHGGANEESLGHLLSEEAADSSGKKTIFGVD : 103  
CAR13\_C : -----IFFLSFSFLISFHSVLSEKLGIQKKKKNLEQDAMHALMKKLESYKLSATDNSEIFNKEMEALKKQIDQLQOHGGANEESLGHLLSEEAADSSGKKTIFGVD : 103  
AMA5\_C : -----IFFLSFSFLISFHSVLSEKLGIQKKKKNLEQDAMHALMKKLESYKLSATDNSEIFNKEMEALKKQIDQLQOHGGANEESLGHLLSEEAADSSGKKTIFGVD : 103  
CAR14\_C : -----IFFLSFSFLISFHSVLSEKLGIQKKKKNLEQDAMHALMKKLESYKLSATDNSEIFNKEMEALKKQIDQLQOHGGANEESLGHLLSEEAADSSGKKTIFGVD : 103  
AMA2\_C : -----IFFLSFSFLISFHSVLSEKLGIQKKKKNLEQDAMHALMKKLESYKLSATDNSEIFNKEMEALKKQIDQLQOHGGANEESLGHLLSEEAADSSGKKTIFGVD : 103  
CAR1\_C : -----IFFLSFSFLISFHSVLSEKLGIQKKKKNLEQDAMHALMKKLESYKLSATDNSEIFNKEMEALKKQIDQLQOHGGANEESLGHLLSEEAADSSGKKTIFGVD : 103  
AND1\_C : -----IFFLSFSFLISFHSVLSEKLGIQKKKKNLEQDAMHALMKKLESYKLSATDNSEIFNKEMEALKKQIDQLQOHGGANEESLGHLLSEEAADSSGKKTIFGVD : 103  
AMA4\_C : -----IFFLSFSFLISFHSVLSEKLGIQKKKKNLEQDAMHALMKKLESYKLSATDNSEIFNKEMEALKKQIDHLQOHGGANEESLGHLLSEEAADSSGKKTIFGVD : 103  
VCGI\_C : -----IFFLSFSFLISFHSVLSEKLGIQKKKKNLEQDAMHALMKKLESYKLSATDNSEIFNKEMEALKKQIDQLQOHGGANEESLGHLLSEEAADSSGKKTIFGVD : 103

S 6S 3V EKLGIQKKKKNLEQDAmHaLMKKLESYKLS3ATDN EIFNKE6 aLKKQIDqLqQHGG NE ESLGHLL EeA1 S KKTIFGVD

\* 120 \* 140 \* 160 \* 180 \* 200 \* 2  
AMA4\_H : EDDL DNYDGDFTGQSKGKFKGHSFKAQKKVEGNDENI-----GGVPVTGNSASN-----SQSTGGSGSQNASPTQGS PSDSAQGSQVTNSAGSTG-----TLST : 197  
AND4\_H : EDDL DNYDGDFTGQSKGKFKGHSFKAQKKVEGNDENI-----GGVPVTGNSASN-----SQSTGGSGSQNASPTQGS PSDSAQGSQVTNSAGSTG-----TLST : 197  
AND1\_H : EDDL DNYDGDFTGQSKGKFKGHSFKAQKKVEGNDENI-----GGVPVTGNSASN-----SQSTGGSGSQNASPPQGS PSDSAQGSQVTNSAGSTG-----TLST : 197  
PAC2\_H : EDDL DNYDADFTGQSKGKIKGHSFKAQKKVEGNDENI-----GGVTVTGNSASN-----SQSTGGSGSQNASPPQGNPQGTQVTNSAGSTG-----TLST : 197  
PAC3\_H : EDDL DNYDGDFTGQSKGKFKGHSFKAQKKVEGNDENI-----GGVPVTGNSASN-----SQSTGGSGSQSDSSPQGS PGGNPQGTQVTNSAGSTG-----TLST : 197  
CAR5\_H : EDDL DNYDGDFTGQSKGKFKGHSFKAQKKVEGNDENFAEAFG----GGVPVTGNSASN-----SQSTGGSGSQSDSSPQGS PGGNPQGTQVTNSAGSTG-----TLST : 202  
AMA3\_H : EDDL DNYDGDFTGQSKGKFKGHSFKAQKKVEGNDENI-----GGVPVTGNSASN-----SQSTGGSGSQNASPTQGS PGGNPQGTQVTNSAGSTG-----TLST : 197  
AND8\_H : EDDL DNYDGDFTGQSKGKFKGHSFKAQKKVEGNDENI-----GGVPVTGNSASN-----SQSTGGSGSQNASPTQGS PGGNPQGTQVTNSAGSTG-----TLST : 197  
AND11\_H : EDDL DNYDGDFTGQSKGKFKGHSFKAQKKVEGNDENF-----GGAPVTGNSAS-----SQPAGVWGSQSDSPPQGS PGGDAQGTQVTNSAGSTG-----TLST : 196  
AND9\_H : EDDL DNYDGDFTGQSKGKFKGHSFKAQKKVEGNDENFAEAFG----GGAPVTGNSAS-----SQPAGVSGSQSDSPPQGS PGGNPQGTQVTNSAGSTG-----TLST : 201  
CAR3\_H : EDDL DNYDGDFTGQSKGKFKGHSFKAQKKVEGNDENFAEAFG----GGAPVTGNSAS-----SQPAGVSGSQSDSPPQGS PGGNPQGTQVTNSAGSTG-----TLST : 201  
CAR6\_H : EDDL DNYDGDFTGQSKGKFKGHSFKAQKKVEGNDENFAEAFG----GGAPVTGNSAS-----SQPAGVSGSQSDSPPQGS PGGNPQGTQVTNSAGSTG-----TLST : 201  
SalI\_H : EDDL DNYDGDFTGQSKGKFKGHSFKAQKKVEGNDENI-----GGVPVTGNSASN-----SQSTGGSGSQNASPPQGS PSDSAQGSQVTNSTGST-----VTLNA : 197  
AND5\_H : EDDL DNYDGDFTGQSKGKFKGHSFKAQKKVEGNDENI-----GGVPVTGNSASN-----SQSTGGSGSQNASPPQGS PSDSAQGSQVTNSTGST-----VTLNA : 197





```

ORI4_C : EDDLNDNYDGDFTGQSKGKIKQADASQS-VKGD DTPRS---N-----LPAAADSSP-----KETAAAGTSSHVVEIGYVNRNSADSSPRAVSGGDSR----PSASGP : 193
PAC5_C : EDDLNDNYDGDFTGQSKGKIKQADAGQS-VKGDVSRP---N-----LPAAADSSP-----KETAPAGTSSGVVEVRYINPNSPDSSPLAAGSGGDST----LSASGP : 193
PAC2_C : EDDLNDNYDADFTGQSKGKIKQADAGQT-VESNVSRP---A-----SSAADNSLP-----KKTTPAGTSSGVVEVRYVNPNSPD-SPSDALSGGGSR----PSSQGP : 192
PAC6_C : EDDLNDNYDADFTGQSKGKIKQADAGQT-VESNVSRP---A-----SSAADNSLP-----KKTTPAGTSSGVVEVRYVNPNSPD-SPSDALSGGGSR----PSSQGP : 192
PAC3_C : EDDLNDNYDADFTGQSKGKIKQADAGQT-VESNVSRP---A-----SSAADNSLP-----KETTTPAGTSSGVVEVRYVNPNSPD-SPSDALSGGGSR----PSSQGP : 192
CAR13_C : EDDLNDNYDADFTGQSKGKIKQADAGQT-VESNVSRP---A-----SSAADNSLP-----KETTTPAGTSSGVVEVRYVNPNSPD-SPSDALSGGGSR----PSSQGP : 192
AMA5_C : EDDLNDNYDADFTGQSKGKIKQADAGQT-VESNVSRP---A-----SSAADNSLP-----KETTTPAGTSSGVVEVRYVNPNSPD-SPSDALSGGGSR----PSSQGP : 192
CAR14_C : EDDLNDNYDADFTGQSKGKIKQADAGQT-VESNVSRP---A-----SSAADNSLP-----KETTTPAGTSSGVVEVRYVNPNSPD-SPSDALSGGGSR----PSSQGP : 192
AMA2_C : EDDLNDNYDADFTGQSKGKIKQADAGQT-VESNVSRP---A-----SSAADNSLP-----KETTTPAGTSSGVVEVRYVNPNSPD-SPSDALSGGGSR----PSSQGP : 192
CAR1_C : EDDLNDNYDADFTGQSKGKIKQADAGQT-VESNVSRP---A-----SSAADNSLP-----KETTTPAGTSSGVVEVRYVNPNSPD-SPSDALSGGGSR----PSSQGP : 192
AND1_C : EDDLNDNYDADFTGQSKGKIKQADAGQT-VESNVSRP---A-----SSAADNSLP-----KETTTPAGTSSGVVEVRYVNPNSPD-SPSDALSGGGSR----PSSQGP : 192
AMA4_C : EDDLNDNYDADFTGQSKGKIKQADAGQT-VESNVSRP---A-----SSAADNSLP-----KKTTPAGTSSGVVEVRYVNPNSPD-SPSDALSGGGSR----PSSQGP : 192
VCGI_C : EDDLNDNYDADFTGQSKGKIKQADAGQT-VESNVSPRA---A-----SSAAGNSLP-----KETTTPAGTSSGVVEVRYVNPNSPD-SPSDALSGGGSR----PSSQGP : 192
EDDLNDNYD DF GQ K
s

```

```

20          *          240          *          260          *          280          *          300          *          320
AMA4_H : SSSSQSTGQSQQSNGAE-----PPAGTTQEVNPNAGQPPPPAGSTG-PAATPGQPEISGRVPNVKYLDKLYDEVLKTDDAKDEIHVPPFHISKYNDFRKKYEFMTMNE : 296
AND4_H : SSSSQSTGQSQQSNGAE-----PPAGTTQEVNPNAGQPPPPAGSTG-PAATPGQPEISGRVPNVKYLDKLYDEVLKTDDAKDEIHVPPFHISKYNDFRKKYEFMTMNE : 296
AND1_H : SSSSQSTGQSQQSNGAE-----PPAGTTQEVNPNAGQPPPPAGSTG-PAATPGQPEISGRVPNVKYLDKLYDEVLKTDDAKDEIHVPPFHISKYNDFRKKYEFMTMNE : 296
PAC2_H : SSSSQSTGQSQQSNGAE-----PPAGTTQEVNTNAGQPPPPAGSTG-PAATPGQPEISGRVPNVKYLDKLYDEVLKTDDAKDEIHVPPFHISKYNDFRKKYEFMTMNE : 296
PAC3_H : SSSSQSTGQSQQSNGAE-----PPAGTTQEVNPNNTAQTSPAGSPGGQAATSGQPEISGRVPNVKYLDKLYDEVLKTDDAKDEIHVPPFHISKYNDFRKKYEFMTMNE : 297
CAR5_H : SSSSQSTGQSQQSNGAE-----PPAGTTQEVNPNAGQTSPPAGSPGGQAATSGQPEISGRVPNVKYLDKLYDEVLKTDDAKDEIHVPPFHISKYNDFRKKYEFMTMNE : 302
AMA3_H : SSSSQSTGQSQPSAGVA-----PSVGNAEAVVTNTEHSSPPAGLPGGQAATSGQPEISGRVPNVKYLDKLYDEVLKTDDAKDEIHVPPFHISKYNDFRKKYEFMTMNE : 297
AND8_H : SSSSQSTGQSQPSAGVA-----PSVGNAEAVVTNTEHSSPPAGLPGGQAATSGQPEISGRVPNVKYLDKLYDEVLKTDDAKDEIHVPPFHISKYNDFRKKYEFMTMNE : 297
AND11_H : SSSSQSTGGSQPSAGVA-----PSVGNAEAVVTNTEHSSPPAGLPGGQAATPGQPEISGRVPNVKYLDKLYDEVLKTDDAKDEIHVPPFHISKYNDFRKKYEFMTMNE : 296
AND9_H : SSSSQSTGGSQPSAGVA-----LPTGTAETVASNTAQTSPAGLPGGQAATPGQPEISGRVPNVKYLDKLYDEVLKTDDAKDEIHVPPFHISKYNDFRKKYEFMTMNE : 301
CAR3_H : SSSSQSTGGSQPSAGVA-----LPTGTAETVASNTAQTSPAGLPGGQAATPGQPEISGRVPNVKYLDKLYDEVLKTDDAKDEIHVPPFHISKYNDFRKKYEFMTMNE : 301
CAR6_H : SSSSQSTGGSQPSAGVA-----LPTGTAETVASNTAQTSPAGLPGGQAATPGQPEISGRVPNVKYLDKLYDEVLKTDDAKDEIHVPPFHISKYNDFRKKYEFMTMNE : 301
SaI1_H : PSSSHSTGQPQQSAGVS-----LPTGTAETVASNTAQTSPAGSPGGQAATSGQPEISGRVPNVKYLDKLYDEVLKTDDAKDEIHVPPFHISKYNDFRKKYEFMTMNE : 297
AND5_H : PSSSHSTGQPQQSAGVS-----LPTGTAETVASNTAQTSPAGSPGGQAATSGQPEISGRVPNVKYLDKLYDEVLKTDDAKDEIHVPPFHISKYNDFRKKYEFMTMNE : 297
CAR1_H : PSSSHSTGQPQQSAGVS-----LPTGTAETVASNTAQTSPAGSPGGQAATSGQPEISGRVPNVKYLDKLYDEVLKTDDAKDEIHVPPFHISKYNDFRKKYEFMTMNE : 297
CAR2_H : PSSSHSTGQPQQSAGVS-----LPTGTAETVASNTAQTSPAGSPGGQAATSGQPEISGRVPNVKYLDKLYDEVLKTDDAKDEIHVPPFHISKYNDFRKKYEFMTMNE : 297
AND3_H : PSSSGPSTGGSQPSAGVS-----LPTGTAETVASNTAQTSPAGSPGGQAATSGQPEISGRVPNVKYLDKLYDEVLKTDDAKDEIHVPPFHISKYNDFRKKYEFMTMNE : 294
CAR8_H : SSSSHSTGQPQQSAGVS-----LPTGTAETVASNTAQTSPAGSPGGQAATSGQPEISGRVPNVKYLDKLYDEVLKTDDAKDEIHVPPFHISKYNDFRKKYEFMTMNE : 300
ORI1_H : SSSSHSTGQPQQSAGVS-----LPTGTAETVASNTAQTSPAGSPGGQAATSGQPEISGRVPNVKYLDKLYDEVLKTDDAKDEIHVPPFHISKYNDFRKKYEFMTMNE : 296
AND10_H : SSSSHSTGQPQQSAGVS-----LPTGTAETVASNTAQTSPAGSPGGQAATSGQPEISGRVPNVKYLDKLYDEVLKTDDAKDEIHVPPFHISKYNDFRKKYEFMTMNE : 299
AND13_H : SSSSHSTGQPQQSAGVS-----LPTGTAETVASNTAQTSPAGSPGGQAATSGQPEISGRVPNVKYLDKLYDEVLKTDDAKDEIHVPPFHISKYNDFRKKYEFMTMNE : 299
CAR11_H : SSSSHSTGQPQQSAGVS-----LPTGTAETVASNTAQTSPAGSPGGQAATSGQPEISGRVPNVKYLDKLYDEVLKTDDAKDEIHVPPFHISKYNDFRKKYEFMTMNE : 299
CAR13_H : SSSSHSTGQPQQSAGVS-----LPTGTAETVASNTAQTSPAGSPGGQAATSGQPEISGRVPNVKYLDKLYDEVLKTDDAKDEIHVPPFHISKYNDFRKKYEFMTMNE : 299
AND12_H : SSSSHSTGQPQQSAGVS-----LPTGTAETVASNTAQTSPAGSPGGQAATSGQPEISGRVPNVKYLDKLYDEVLKTDDAKDEIHVPPFHISKYNDFRKKYEFMTMNE : 299
AND7_H : SSSSHSTGQPQQSAGVS-----LPTGTAETVASNTAQTSPAGSPGGQAATSGQPEISGRVPNVKYLDKLYDEVLKTDDAKDEIHVPPFHISKYNDFRKKYEFMTMNE : 299
AND2_H : SSSSHSTGQPQQSAGVS-----LPTGTAETVASNTAQTSPAGSPGGQAATSGQPEISGRVPNVKYLDKLYDEVLKTDDAKDEIHVPPFHISKYNDFRKKYEFMTMNE : 299
AND14_H : SSSSHSTGQPQQSAGVS-----LPTGTAETVASNTAQTSPAGSPGGQAATSGQPEISGRVPNVKYLDKLYDEVLKTDDAKDEIHVPPFHISKYNDFRKKYEFMTMNE : 296
PAC6_H : SSSSHSTGQPQQSAGVS-----LPTGTAETVASNTAQTSPAGSPGGQAATSGQPEISGRVPNVKYLDKLYDEVLKTDDAKDEIHVPPFHISKYNDFRKKYEFMTMNE : 299
CAR4_H : SSSSHSTGQPQQSAGVS-----LPTGTAETVASNTAQTSPAGSPGGQAATSGQPEISGRVPNVKYLDKLYDEVLKTDDAKDEIHVPPFHISKYNDFRKKYEFMTMNE : 299
VCGI_H : SSSSPSTGGSQPSAGVS-----LPTGTAETVASNTAQTSPAGLPGGQAATPGQPEISGRVPNVKYLDKLYDEVLKTDDAKDEIHVPPFHISKYNDFRKKYEFMTMNE : 299

```
