# Supplementary material for: Genetic Diversity and Selection in Three Plasmodium vivax Merozoite Surface Protein 7 (Pvmsp-7) Genes in a Colombian Population
Source: PubMed Central journal article supplement (PMC3458108; doi:10.1371/journal.pone.0045962), 2012-09-25
Supplement: pone.0045962.s014.pdf [file pone.0045962.s014.pdf]

**Table S1:** Nucleotide diversity for *P. vivax* antigens

| Gene                            | isolates | sites | $\pi$  | Reference                          |
|---------------------------------|----------|-------|--------|------------------------------------|
| <i>msp-7C</i>                   | 39       | 1,043 | 0.0548 | This study                         |
| <i>msp-3<math>\alpha</math></i> | 35       | 2,577 | 0.0496 | (MASCORRO <i>et al.</i> 2005)      |
| <i>rbp-2</i>                    | 4        | 8,454 | 0,0481 | (RAYNER <i>et al.</i> 2005)        |
| <i>msp-7I</i>                   | 44       | 1,053 | 0.0430 | This study                         |
| <i>msp-1</i>                    | 175      | 417   | 0.0451 | (FIGTREE <i>et al.</i> 2000)       |
| <i>msp-5</i>                    | 22       | 1,524 | 0.0375 | (GOMEZ <i>et al.</i> 2006)         |
| <i>msp-7H</i>                   | 59       | 1,068 | 0.0357 | This study                         |
| <i>ama-1</i>                    | 72       | 900   | 0.0130 | (THAKUR <i>et al.</i> 2008)        |
| <i>dbp</i>                      | 23       | 1,388 | 0.0122 | (MARTINEZ <i>et al.</i> 2004)      |
| <i>trap</i>                     | 39       | 1,470 | 0.0059 | (PUTAPORNTIP <i>et al.</i> 2001)   |
| <i>msp-7K</i>                   | 27       | 886   | 0.0022 | (GARZON-OSPINA <i>et al.</i> 2011) |
| <i>rbp-1</i>                    | 4        | 8,499 | 0.0018 | (RAYNER <i>et al.</i> 2005)        |
| <i>rap-2</i>                    | 35       | 1,161 | 0.0013 | (GARZON-OSPINA <i>et al.</i> 2010) |
| <i>msp-4</i>                    | 30       | 846   | 0.0011 | (MARTINEZ <i>et al.</i> 2005)      |
| <i>rap-1</i>                    | 29       | 2,413 | 0.0008 | (GARZON-OSPINA <i>et al.</i> 2010) |
| <i>msp-7A</i>                   | 29       | 1,100 | 0.0002 | (GARZON-OSPINA <i>et al.</i> 2011) |
| <i>msp-10</i>                   | 23       | 1,336 | 0.0002 | (GARZON-OSPINA <i>et al.</i> 2011) |

n: number of isolates,  $\pi$ : nucleotide diversity.

## References

- FIGTREE, M., C. J. PASAY, R. SLADE, Q. CHENG, N. CLOONAN *et al.*, 2000 *Plasmodium vivax* synonymous substitution frequencies, evolution and population structure deduced from diversity in AMA 1 and MSP 1 genes. *Mol Biochem Parasitol* **108**: 53-66.
- GARZON-OSPINA, D., L. ROMERO-MURILLO and M. A. PATARROYO, 2010 Limited genetic polymorphism of the *Plasmodium vivax* low molecular weight rhoptry protein complex in the Colombian population. *Infect Genet Evol* **10**: 261-267.
- GARZON-OSPINA, D., L. ROMERO-MURILLO, L. F. TOBON and M. A. PATARROYO, 2011 Low genetic polymorphism of merozoite surface proteins 7 and 10 in Colombian *Plasmodium vivax* isolates. *Infect Genet Evol* **11**: 528-531.
- GOMEZ, A., C. F. SUAREZ, P. MARTINEZ, C. SARAVIA and M. A. PATARROYO, 2006 High polymorphism in *Plasmodium vivax* merozoite surface protein-5 (MSP5). *Parasitology* **133**: 661-672.
- MARTINEZ, P., C. F. SUAREZ, P. P. CARDENAS and M. A. PATARROYO, 2004 *Plasmodium vivax* Duffy binding protein: a modular evolutionary proposal. *Parasitology* **128**: 353-366.
- MARTINEZ, P., C. F. SUAREZ, A. GOMEZ, P. P. CARDENAS, J. E. GUERRERO *et al.*, 2005 High level of conservation in *Plasmodium vivax* merozoite surface protein 4 (PvMSP4). *Infect Genet Evol* **5**: 354-361.

- MASCORRO, C. N., K. ZHAO, B. KHUNTIRAT, J. SATTABONGKOT, G. YAN *et al.*, 2005  
Molecular evolution and intragenic recombination of the merozoite surface protein  
MSP-3alpha from the malaria parasite *Plasmodium vivax* in Thailand. *Parasitology*  
**131**: 25-35.
- PUTAPORNTIP, C., S. JONGWUTIWES, T. TIA, M. U. FERREIRA, H. KANBARA *et al.*, 2001  
Diversity in the thrombospondin-related adhesive protein gene (TRAP) of  
*Plasmodium vivax*. *Gene* **268**: 97-104.
- RAYNER, J. C., T. M. TRAN, V. CORREDOR, C. S. HUBER, J. W. BARNWELL *et al.*, 2005  
Dramatic difference in diversity between *Plasmodium falciparum* and *Plasmodium*  
*vivax* reticulocyte binding-like genes. *Am J Trop Med Hyg* **72**: 666-674.
- THAKUR, A., M. T. ALAM, H. BORA, P. KAUR and Y. D. SHARMA, 2008 *Plasmodium vivax*:  
sequence polymorphism and effect of natural selection at apical membrane antigen  
1 (PvAMA1) among Indian population. *Gene* **419**: 35-42.
