# Supplementary material for: Genetic Diversity and Selection in Three Plasmodium vivax Merozoite Surface Protein 7 (Pvmsp-7) Genes in a Colombian Population
Source: PubMed Central journal article supplement (PMC3458108; doi:10.1371/journal.pone.0045962), 2012-09-25
Supplement: pone.0045962.s015.pdf [file pone.0045962.s015.pdf]

**Table S2:** Nucleotide diversity ( $\pi$ ) values for subpopulations within Colombia.

| <b>n</b>  | <b>Gene</b>   | <b>Origin</b> | <b>Sites</b> | <b><math>\pi</math></b> |
|-----------|---------------|---------------|--------------|-------------------------|
| Amazon    |               |               |              |                         |
| 4         | <i>msp-7C</i> |               | 1,101        | 0.0059 (0.002)          |
| 4         | <i>msp-7H</i> |               | 1,146        | 0.0460 (0.009)          |
| 4         | <i>msp-7I</i> |               | 1,109        | 0.0658 (0.014)          |
| Andean    |               |               |              |                         |
| 8         | <i>msp-7C</i> |               | 1,098        | 0.0571 (0.009)          |
| 14        | <i>msp-7H</i> |               | 1,137        | 0.0336 (0.004)          |
| 13        | <i>msp-7I</i> |               | 1,109        | 0.0392 (0.008)          |
| Caribbean |               |               |              |                         |
| 15        | <i>msp-7C</i> |               | 1,098        | 0.0506 (0.008)          |
| 10        | <i>msp-7H</i> |               | 1,149        | 0.0398 (0.006)          |
| 12        | <i>msp-7I</i> |               | 1,109        | 0.0425 (0.008)          |
| Orinoco   |               |               |              |                         |
| 4         | <i>msp-7C</i> |               | 1,119        | 0.0531 (0.019)          |
| 2         | <i>msp-7H</i> |               | 1,149        | 0.0252 (0.013)          |
| 5         | <i>msp-7I</i> |               | 1,133        | 0.0525 (0.014)          |
| Pacific   |               |               |              |                         |
| 6         | <i>msp-7C</i> |               | 1,098        | 0.0525 (0.010)          |
| 7         | <i>msp-7H</i> |               | 1,146        | 0.0443 (0.010)          |
| 8         | <i>msp-7I</i> |               | 1,109        | 0.0620 (0.008)          |
