# Supplementary material for: Genetic Diversity and Selection in Three Plasmodium vivax Merozoite Surface Protein 7 (Pvmsp-7) Genes in a Colombian Population
Source: PubMed Central journal article supplement (PMC3458108; doi:10.1371/journal.pone.0045962), 2012-09-25
Supplement: pone.0045962.s016.pdf [file pone.0045962.s016.pdf]

**Table S3:** Nucleotide and amino acid positions within the 5'- end, central region and 3'-end.

|               | <b>5'-end</b> | <b>central region</b> | <b>3'-end</b> |                   |
|---------------|---------------|-----------------------|---------------|-------------------|
| <i>msp-7C</i> | 1-390         | 391-717               | 718-1,191     | <b>Nucleotide</b> |
|               | 1-130         | 131-239               | 240-397       | <b>Amino acid</b> |
| <i>msp-7H</i> | 1-471         | 472-771               | 772-1,200     | <b>Nucleotide</b> |
|               | 1-157         | 158-257               | 258-400       | <b>Amino acid</b> |
| <i>msp-7I</i> | 1-525         | 526-789               | 790-1,188     | <b>Nucleotide</b> |
|               | 1-175         | 176-263               | 264-396       | <b>Amino acid</b> |
