# Supplementary material for: Genetic Diversity and Selection in Three Plasmodium vivax Merozoite Surface Protein 7 (Pvmsp-7) Genes in a Colombian Population
Source: PubMed Central journal article supplement (PMC3458108; doi:10.1371/journal.pone.0045962), 2012-09-25
Supplement: pone.0045962.s017.pdf [file pone.0045962.s017.pdf]

**Table S4:** Positively selected sites for *Pvm*sp-7 genes without taking recombination into account.

|                        | <b>SLAC</b> | <b>FEL</b>                                                                       | <b>REL</b>                                                                                              | <b>IFEL</b>                                                                                                                                                                                                                             |
|------------------------|-------------|----------------------------------------------------------------------------------|---------------------------------------------------------------------------------------------------------|-----------------------------------------------------------------------------------------------------------------------------------------------------------------------------------------------------------------------------------------|
| <i>m</i> sp-7 <i>C</i> |             | 135, 145 and 184                                                                 | 135, 145, 146, 152,<br>155, 160, 161, 162,<br>167, 172, 179, 184,<br>185, 186, 187, 194,<br>201 and 229 | 147 and 172                                                                                                                                                                                                                             |
| <i>m</i> sp-7 <i>H</i> | 206 and 244 | 169, 171, 176, 179,<br>180, 183, 206, 207,<br>214, 222, 224, 225,<br>236 and 244 | 169, 171, 179, 183,<br>206, 207, 209, 214,<br>222, 224, 225, 230,<br>236 and 244                        | 76,81, 84, 100,127,<br>145, 149, 161, 165,<br>168, 169, 171, 172,<br>173, 175, 176, 177,<br>178, 179, 180, 183,<br>196, 198, 201, 202,<br>206, 207, 209, 211,<br>214, 216, 217, 219,<br>222, 227, 229, 230,<br>236, 244, 365 and<br>369 |
| <i>m</i> sp-7 <i>I</i> |             | 178, 179, 181, 211,<br>214, 218 and 294                                          |                                                                                                         | 178, 179, 181, 185,<br>187, 193, 211, 214<br>and 218                                                                                                                                                                                    |

Numbers according to the reference Sal-I protein sequence *Pvm*sp-7*C*: XP\_001614132.1, *Pvm*sp-7*H*: XP\_001614137.1 and *Pvm*sp-7*I*: XP\_001614138.1.
