# Supplementary material for: Genetic Diversity and Selection in Three Plasmodium vivax Merozoite Surface Protein 7 (Pvmsp-7) Genes in a Colombian Population
Source: PubMed Central journal article supplement (PMC3458108; doi:10.1371/journal.pone.0045962), 2012-09-25
Supplement: pone.0045962.s018.pdf [file pone.0045962.s018.pdf]

**Table S5:** Negatively selected sites for *Pvmsp-7* genes without taking recombination into account.

|                        | <b>SLAC</b>                                                                             | <b>FEL</b>                                                                                                                                                      | <b>REL</b>                                                                                                                                                             | <b>IFEL</b>                                                                                                                           |
|------------------------|-----------------------------------------------------------------------------------------|-----------------------------------------------------------------------------------------------------------------------------------------------------------------|------------------------------------------------------------------------------------------------------------------------------------------------------------------------|---------------------------------------------------------------------------------------------------------------------------------------|
| <i>m</i> sp-7 <i>C</i> | 52, 71, 96, 103, 112,<br>125, 247 and 263                                               | 38, 52, 57, 65, 70, 71,<br>96, 97, 102, 103, 112,<br>122, 123, 125, 195,<br>225, 230, 247, 248,<br>254 and 263                                                  | 38, 52, 57, 65, 70, 71,<br>96, 97, 102, 103, 112,<br>123, 195, 225, 230,<br>247, 248, 254 and<br>263                                                                   | 52, 71, 96, 97, 103,<br>112, 125, 195, 230,<br>247 and 263                                                                            |
| <i>m</i> sp-7 <i>H</i> | 25, 37, 44, 47, 69, 73,<br>75, 97, 101, 105, 129,<br>144, 146, 182, 204,<br>255 and 261 | 25, 37, 38, 44, 47, 56,<br>57, 69, 73, 75, 79, 85,<br>88, 91, 97, 101, 105,<br>106, 111, 122, 124,<br>129, 144, 146, 147,<br>182, 204, 253, 255,<br>261 and 296 | 25, 37, 38, 44, 47, 69,<br>73, 75, 79, 88, 91, 97,<br>101, 105, 106, 129,<br>144, 146, 147, 182,<br>204, 253, 255 and<br>296                                           | 25, 37, 38, 44, 47, 53,<br>57, 69, 73, 75, 79, 88,<br>97, 101, 105, 106,<br>129, 144, 146, 147,<br>182, 204, 253, 255,<br>261 and 296 |
| <i>m</i> sp-7 <i>I</i> | 14, 85, 111, 112, 127,<br>257, 265, 292, 302,<br>307, 358 and 359                       | 14, 37, 47, 85, 87,<br>100, 111, 112, 127,<br>228, 257, 265, 292,<br>302, 307, 358 and<br>359                                                                   | 14, 37, 38, 47, 85, 87,<br>100, 111, 112, 127,<br>132, 153, 154, 155,<br>172, 191, 198, 212,<br>228, 234, 237, 246,<br>251, 257, 265, 292,<br>302, 307, 358 and<br>359 | 14, 37, 47, 85, 87,<br>100, 111, 112, 127,<br>153, 154, 228, 257,<br>265, 292, 302, 307,<br>358 and 359                               |

Numbers according to the reference Sal-I protein sequence *Pvmsp-7C*: XP\_001614132.1, *Pvmsp-7H*: XP\_001614137.1 and *Pvmsp-7I*: XP\_001614138.1.
