# Supplementary material for: Genetic Diversity and Selection in Three Plasmodium vivax Merozoite Surface Protein 7 (Pvmsp-7) Genes in a Colombian Population
Source: PubMed Central journal article supplement (PMC3458108; doi:10.1371/journal.pone.0045962), 2012-09-25
Supplement: pone.0045962.s019.pdf [file pone.0045962.s019.pdf]

**Table S6:** Positively selected sites detected for *Pvm*sp-7 genes taking recombination into account.

|                        | <b>SLAC</b> | <b>FEL</b>                        | <b>REL</b>  | <b>IFEL</b>                        |
|------------------------|-------------|-----------------------------------|-------------|------------------------------------|
| <i>m</i> sp-7 <i>C</i> |             | 145, 184                          |             |                                    |
| <i>m</i> sp-7 <i>H</i> | 244         | 171,176, 187, 214,<br>225 and 244 | 244 and 365 | 171, 206, 214, 224,<br>236 and 244 |
| <i>m</i> sp-7 <i>I</i> | 179         | 178, 179, 181 and<br>187          |             | 178, 179, 181 and<br>187           |

Numbers according to the reference Sal-I protein sequence *Pvm*sp-7*C*: XP\_001614132.1, *Pvm*sp-7*H*: XP\_001614137.1 and *Pvm*sp-7*I*: XP\_001614138.1.
