# Supplementary material for: Genetic Diversity and Selection in Three Plasmodium vivax Merozoite Surface Protein 7 (Pvmsp-7) Genes in a Colombian Population
Source: PubMed Central journal article supplement (PMC3458108; doi:10.1371/journal.pone.0045962), 2012-09-25
Supplement: pone.0045962.s020.pdf [file pone.0045962.s020.pdf]

**Table S7:** Negatively selected sites detected for *Pvmmsp-7* genes taking recombination into account.

|                        | <b>SLAC</b>                      | <b>FEL</b>                                                                                                | <b>REL</b>                                                                                                                                                                                                  | <b>IFEL</b>                                                             |
|------------------------|----------------------------------|-----------------------------------------------------------------------------------------------------------|-------------------------------------------------------------------------------------------------------------------------------------------------------------------------------------------------------------|-------------------------------------------------------------------------|
| <i>m</i> sp-7 <i>C</i> | 103, 112 and 125                 | 38, 52, 57, 65, 70, 71, 96, 102, 103, 112, 122, 123, 125, 176, 195, 202, 225, 230, 248 and 254            | 38, 39, 52, 53, 57, 65, 68, 70, 71, 76, 96, 97, 98, 100, 102, 103, 112, 121, 122, 123, 125, 126, 139, 142, 164, 176, 188, 195, 202, 209, 213, 215, 221, 222, 224, 225, 226, 229, 230, 247, 248, 254 and 263 | 52, 65, 70, 71, 96, 102, 103, 112, 122, 123, 125, 176, 195, 225 and 230 |
| <i>m</i> sp-7 <i>H</i> | 44, 47, 69, 97, 101, 144 and 146 | 25, 37, 44, 47, 56, 57, 69, 73, 79, 85, 97, 101, 105, 111, 122, 124, 129, 144, 146, 147, 204, 255 and 296 | 25, 44, 47, 69, 97, 101, 129, 144, 146, 147, 204 and 255                                                                                                                                                    | 44, 47, 53, 69, 97, 101, 129, 144, 146, 147, 204, 255 and 296           |
| <i>m</i> sp-7 <i>I</i> | 14, 85, 257 and 265              | 14, 37, 47, 85, 87, 111, 112, 127, 257, 265, 302, 358 and 359                                             | 14, 85, 87, 112, 257, 265, 302                                                                                                                                                                              | 14, 37, 47, 85, 87, 111, 112, 257, 265, 302, 358 and 359                |

Numbers according to the reference Sal-I protein sequence *Pvmmsp-7C*: XP\_001614132.1, *Pvmmsp-7H*: XP\_001614137.1 and *Pvmmsp-7I*: XP\_001614138.1.
