# Supplementary material for: Genetic Diversity and Selection in Three Plasmodium vivax Merozoite Surface Protein 7 (Pvmsp-7) Genes in a Colombian Population
Source: PubMed Central journal article supplement (PMC3458108; doi:10.1371/journal.pone.0045962), 2012-09-25
Supplement: pone.0045962.s021.pdf [file pone.0045962.s021.pdf]

**Table S8:** Conversion tracks identified by DnaSP and GENECONV, between *Pvm*msp-7 genes.

| <i>msp-7C/msp-7H</i> | <i>msp-7C/msp-7I</i> | <i>msp-7H/msp-7I</i> |                   |
|----------------------|----------------------|----------------------|-------------------|
| 114-245              | 156-171              | 114-144              | <b>Nucleotide</b> |
| 38-82                | 52-57                | 38-48                | <b>Amino acid</b> |
| 156-225              | 838-1085             | 144-171              | <b>Nucleotide</b> |
| 52-75                | 280-362              | 38-57                | <b>Amino acid</b> |
| 291-382              |                      | 240-245              | <b>Nucleotide</b> |
| 97-128               |                      | 80-82                | <b>Amino acid</b> |
| 294-306              |                      | 254-276              | <b>Nucleotide</b> |
| 98-102               |                      | 85-92                | <b>Amino acid</b> |
| 804-809              |                      | 291-306              | <b>Nucleotide</b> |
| 268-270              |                      | 97-102               | <b>Amino acid</b> |
| 71-265               |                      | 1,155-1,169          | <b>Nucleotide</b> |
| 24-89                |                      | 385-390              | <b>Amino acid</b> |
| 1,089-1,180          |                      | 913-1,090            | <b>Nucleotide</b> |
| 363-394              |                      | 305-364              | <b>Amino acid</b> |
|                      |                      | 913-1175             | <b>Nucleotide</b> |
|                      |                      | 305-392              | <b>Amino acid</b> |

Nucleotides and amino acids based on alignment of the Fig S13.
