# Supplementary material for: Genetic Diversity and Selection in Three Plasmodium vivax Merozoite Surface Protein 7 (Pvmsp-7) Genes in a Colombian Population
Source: PLoS One. 2012 Sep 25;7(9):e45962. doi: 10.1371/journal.pone.0045962 (PMC3458108; doi:10.1371/journal.pone.0045962)
Supplement: Table S9 — Nucleotides and amino acid positions excluded from the analysis. (PDF) [file pone.0045962.s022.pdf]

**Table S9:** Nucleotides and amino acid positions excluded from the analysis.

[illegible]
